# Supplementary material for: Patterns of Genomic Variations in the Plant Pathogen Dickeya solani
Source: MDPI journal article supplement (doi:10.3390/microorganisms10112254), 2022-11-14
Supplement: s1 [file s1]

1

1

1

[illegible]

1

1

5

22

13311A

Dickeya solani CH05026

Dickeya solani CH07044

Dickeya solani CH9635-1

Dickeya solani CH9918-774

Dickeya solani D12

Dickeya solani Ds0432-1

Dickeya solani F012

Dickeya solani IFB0099

Dickeya solani IFB0167

Dickeya solani IFB0212

Dickeya solani IFB0223

Dickeya solani IFB0231

Dickeya solani IFB0311

Dickeya solani IFB0421

Dickeya solani IFB 0158

Dickeya solani IFB 0221

Dickeya solani IPO2019

Dickeya solani IPO 2222

Dickeya solani M21a

Dickeya solani MIE35

Dickeya solani MK10

Dickeya solani MK16 MK16

Dickeya solani PPO9019

Dickeya solani PPO9134

Dickeya solani RNS10-27-2A

Dickeya solani RNS 082331A

Dickeya solani Sp1a

Dickeya solani RNS08.23.3.1A

Dickeya solani GBBC2040

Dickeya\_solani\_IFB0417

1

1 | Dickeya\_solani\_IFB0487

1

1 Dickeya\_solani\_IFB0695

A horizontal number line with vertical tick marks at both ends. Below the line, the number 0.501 is written under the left tick mark, and the number 0.502 is written under the right tick mark. A third tick mark is located between the two, and the number 0.501702 is written below it.

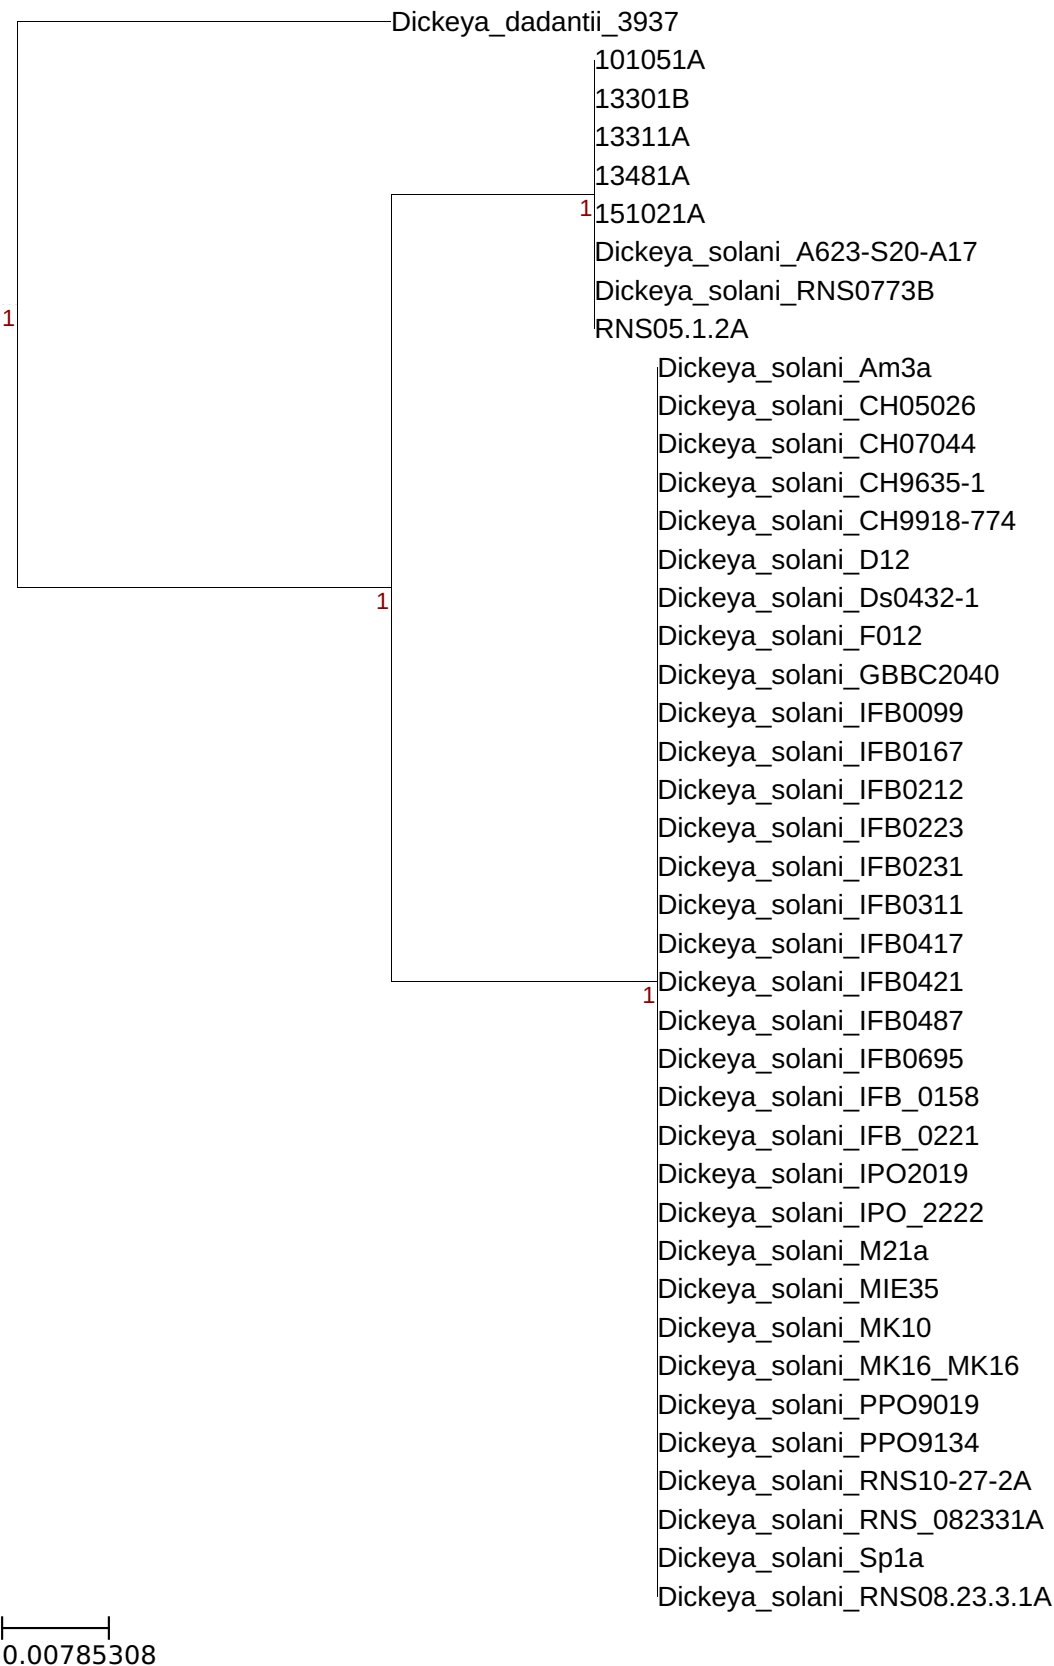

0.00785308

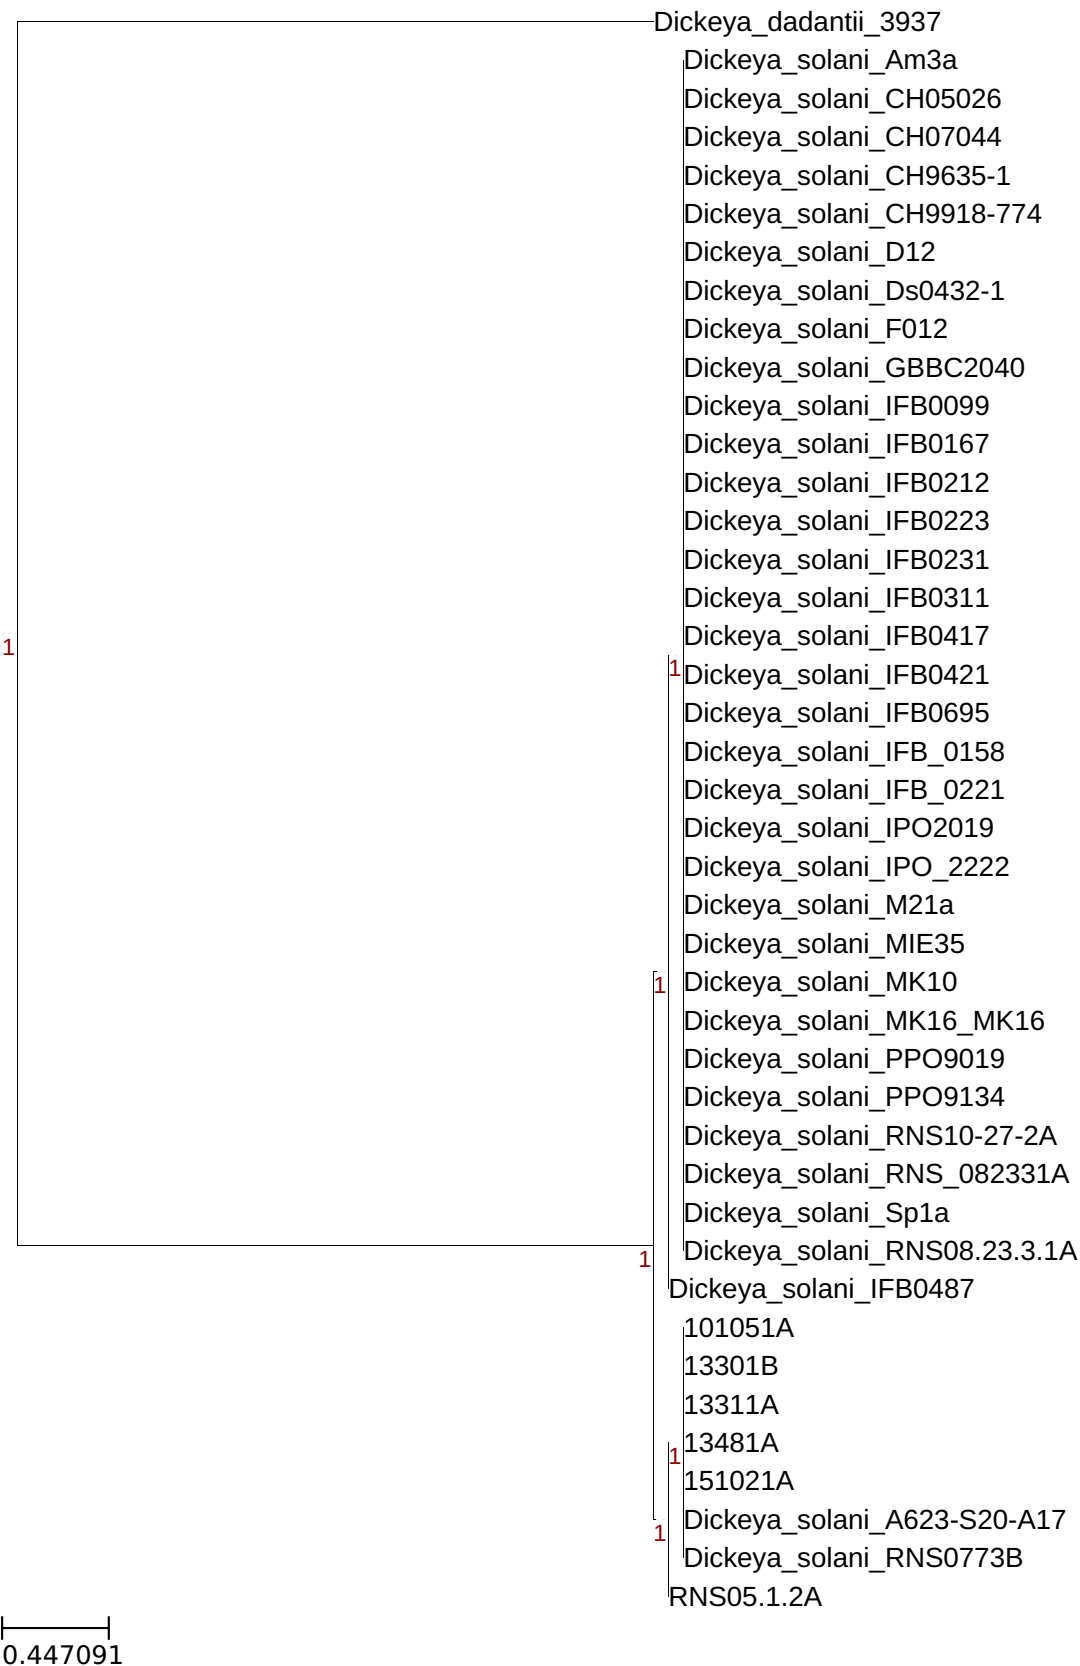

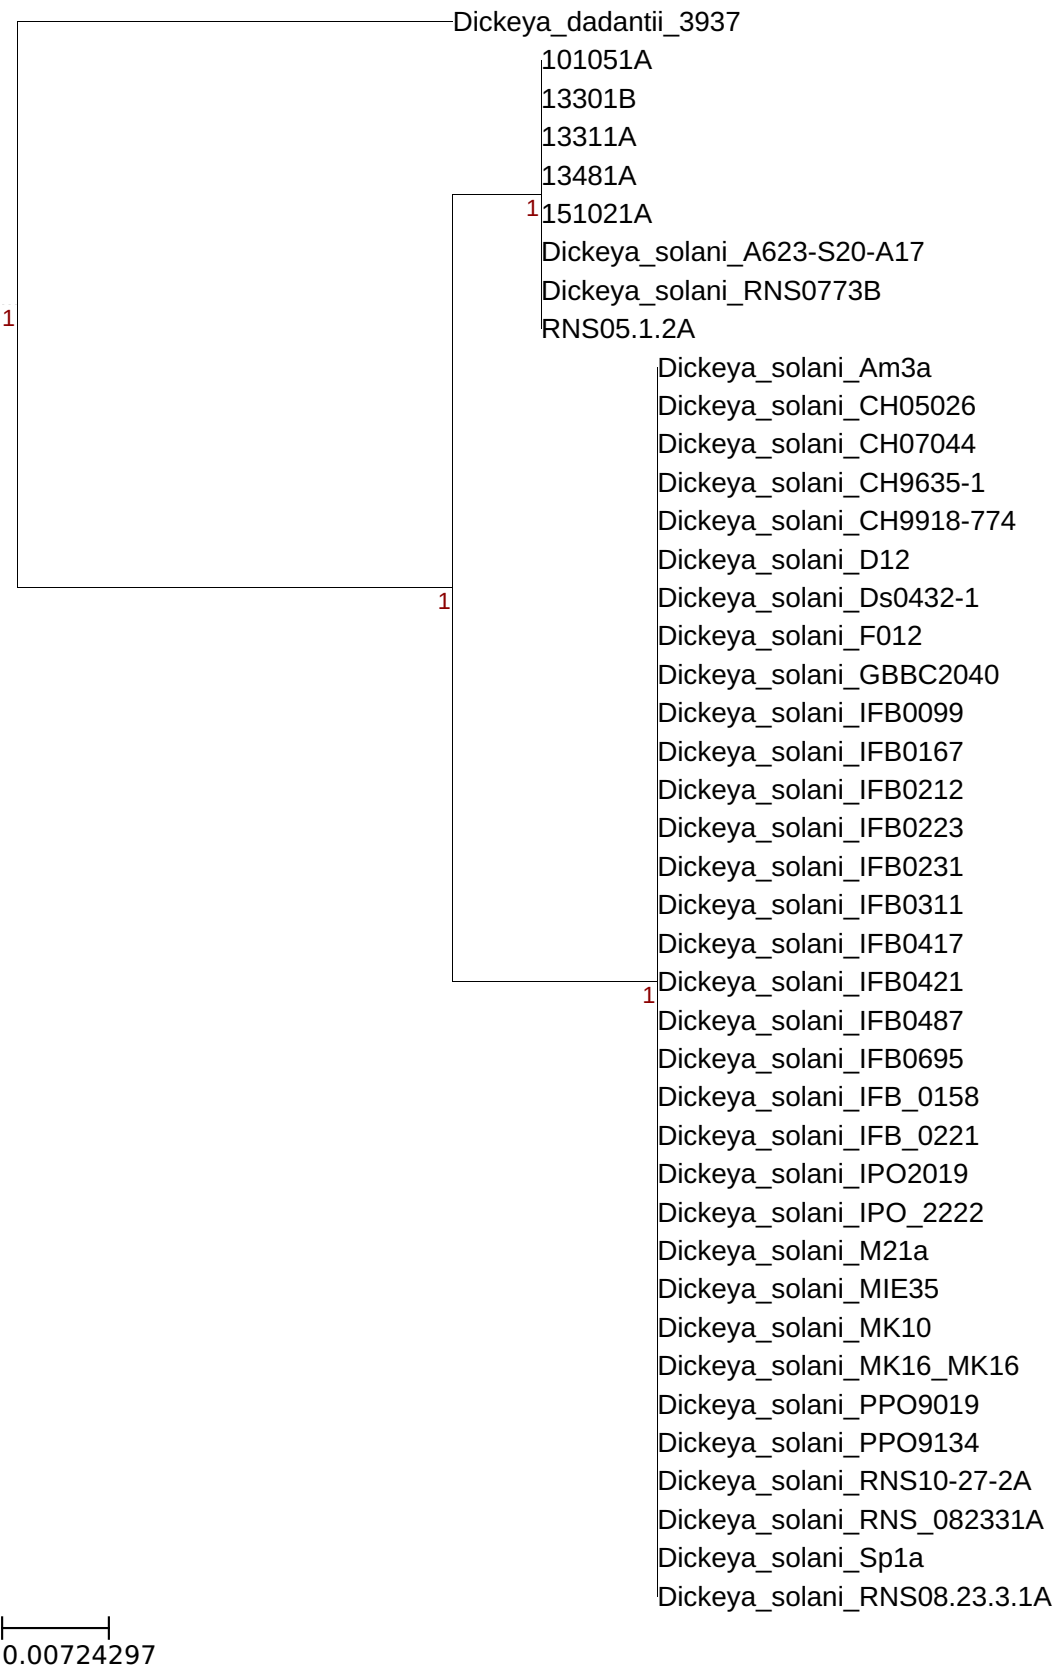

0.00724297

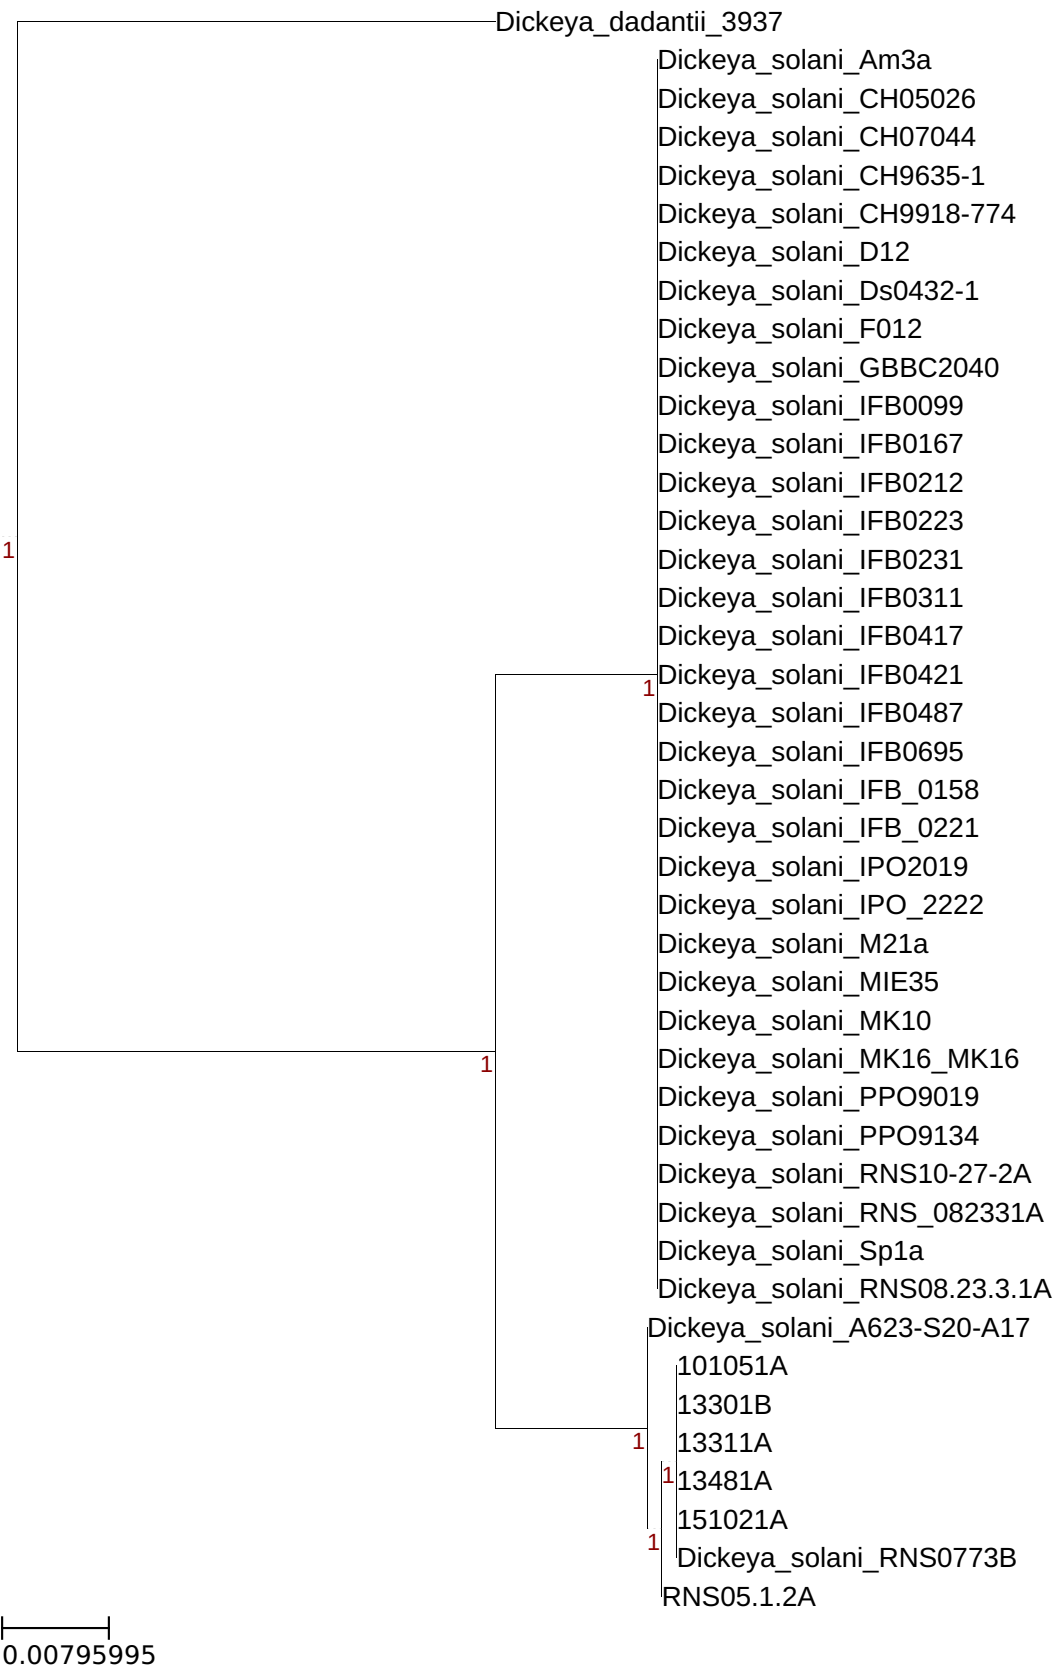

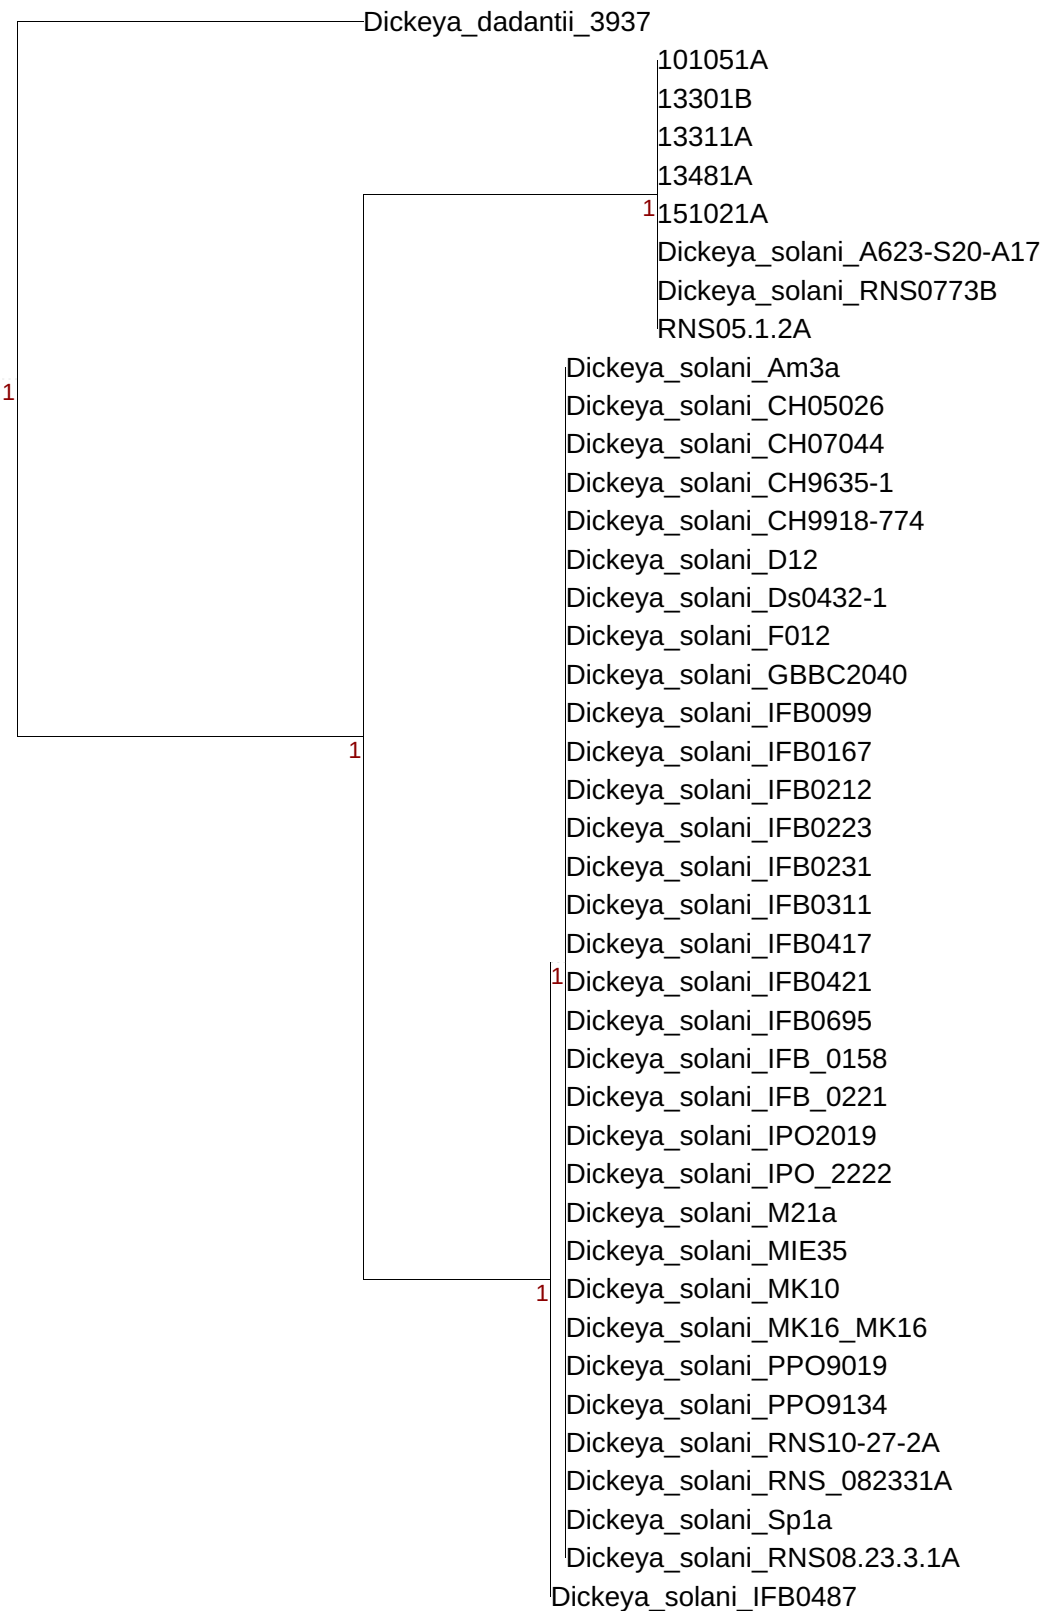

0.00505632

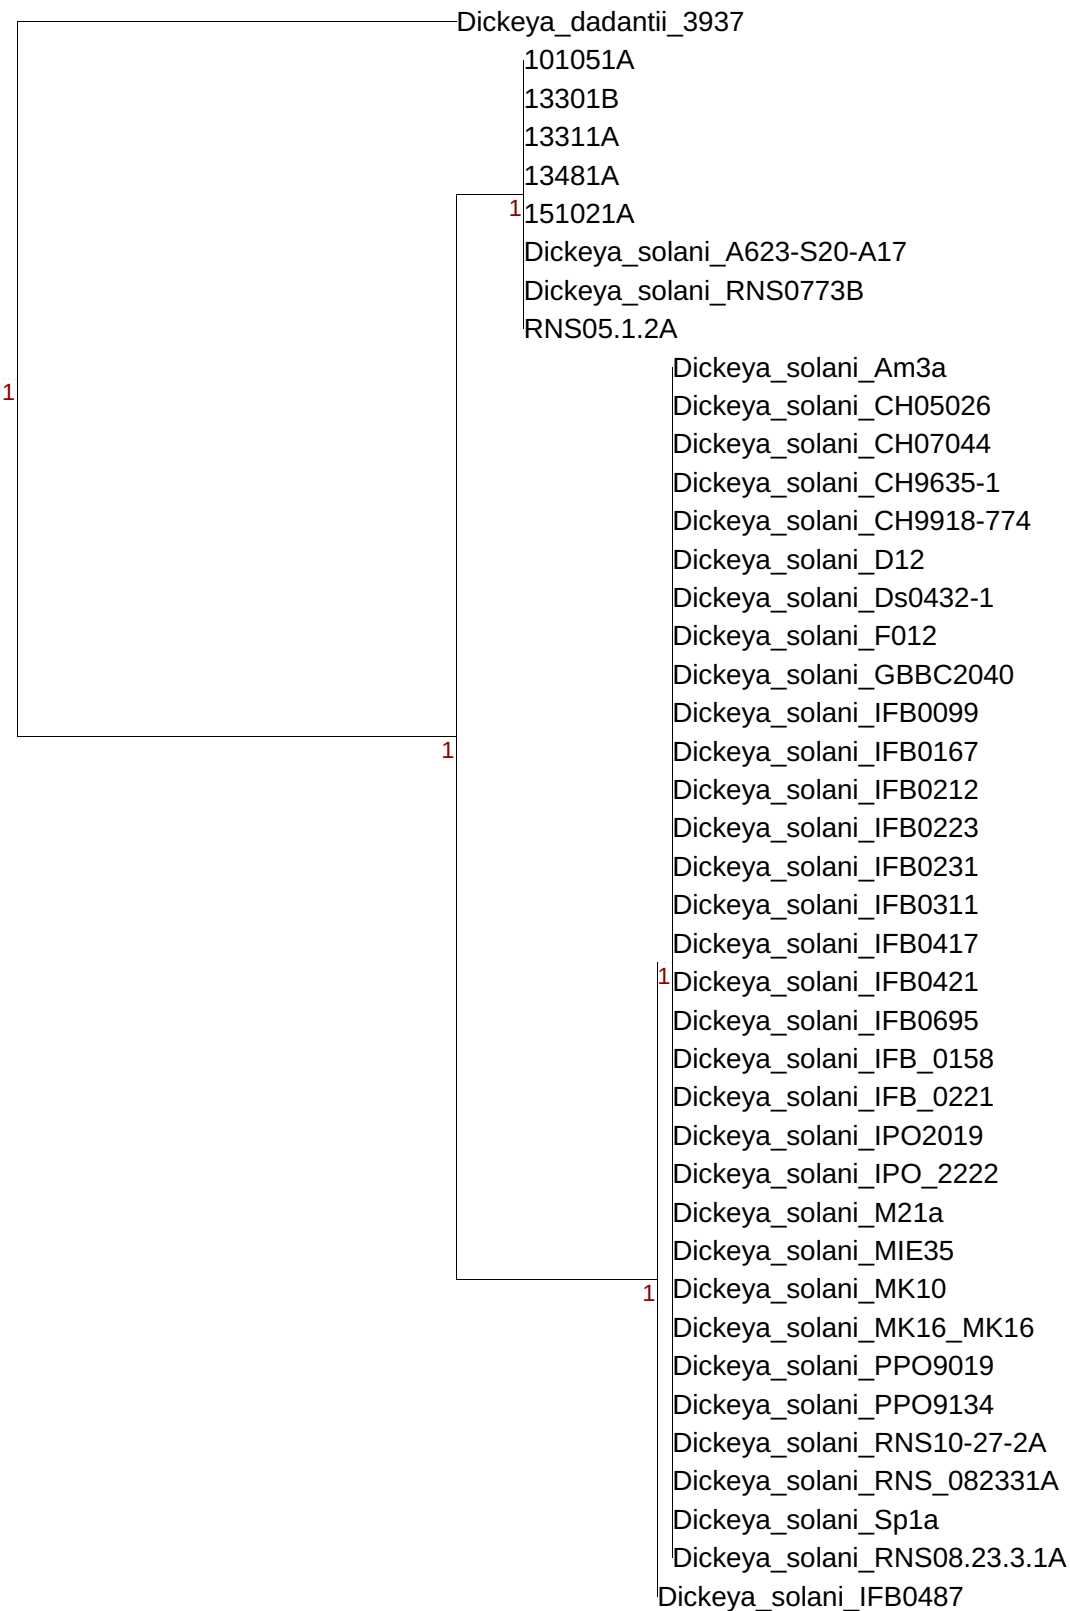

0.00866015

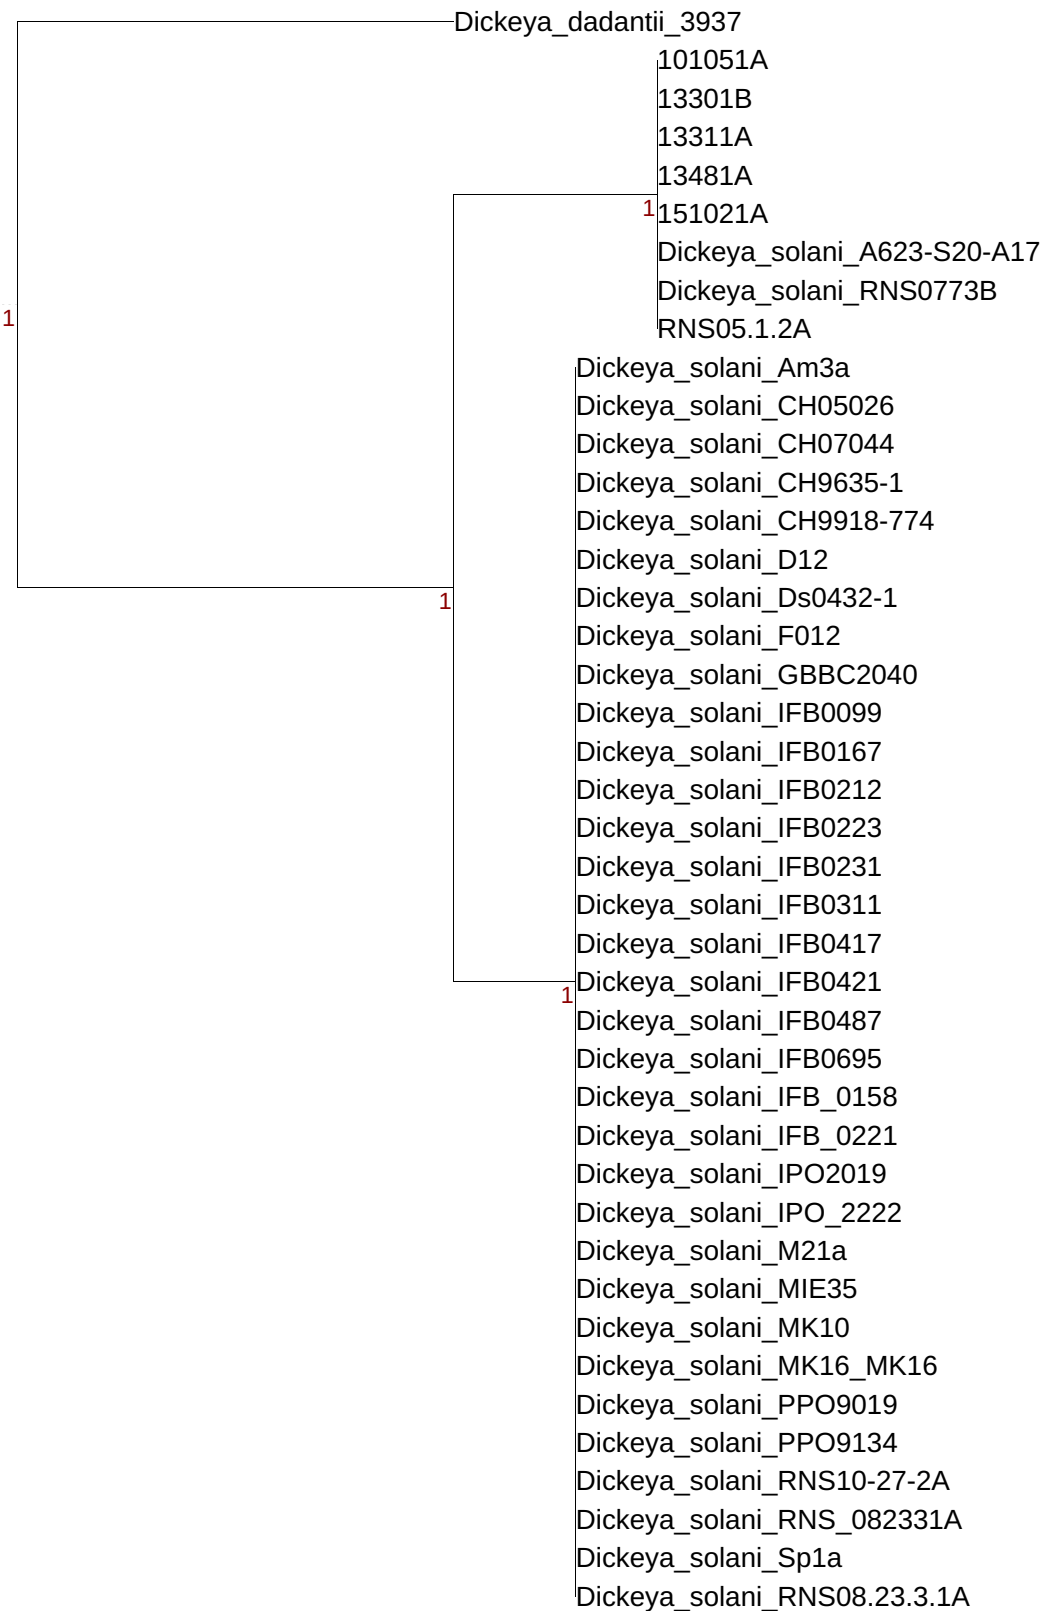

0.00618952



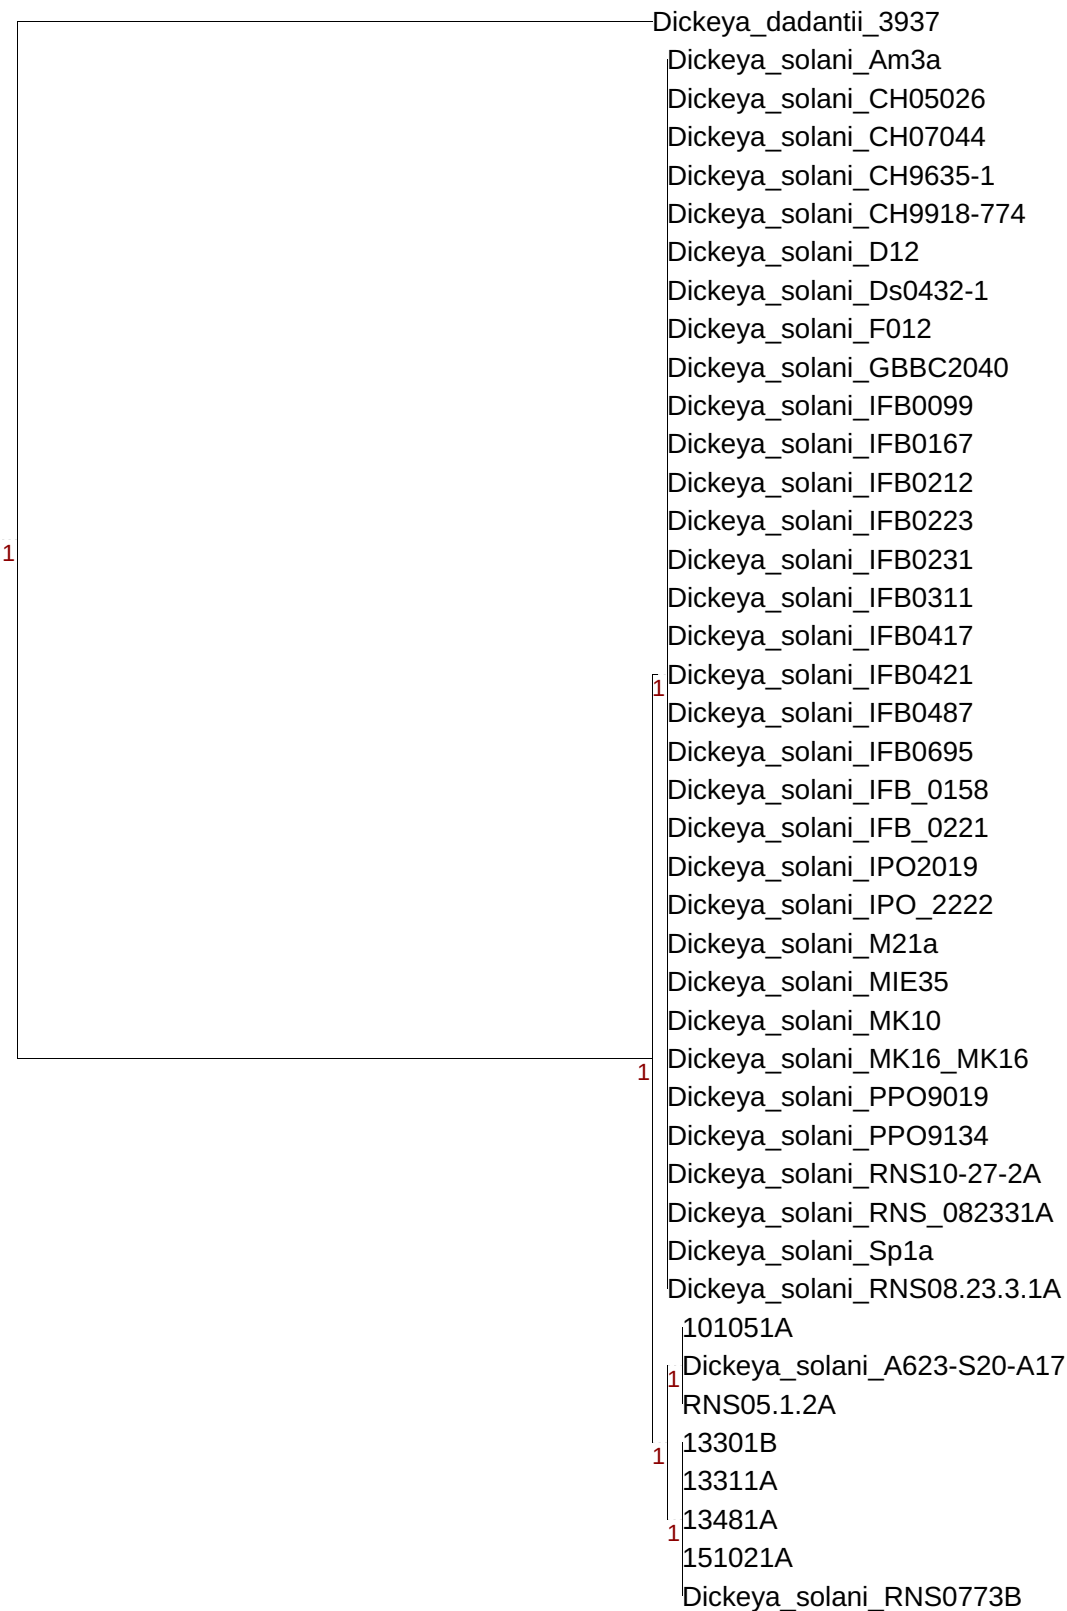

0.500659

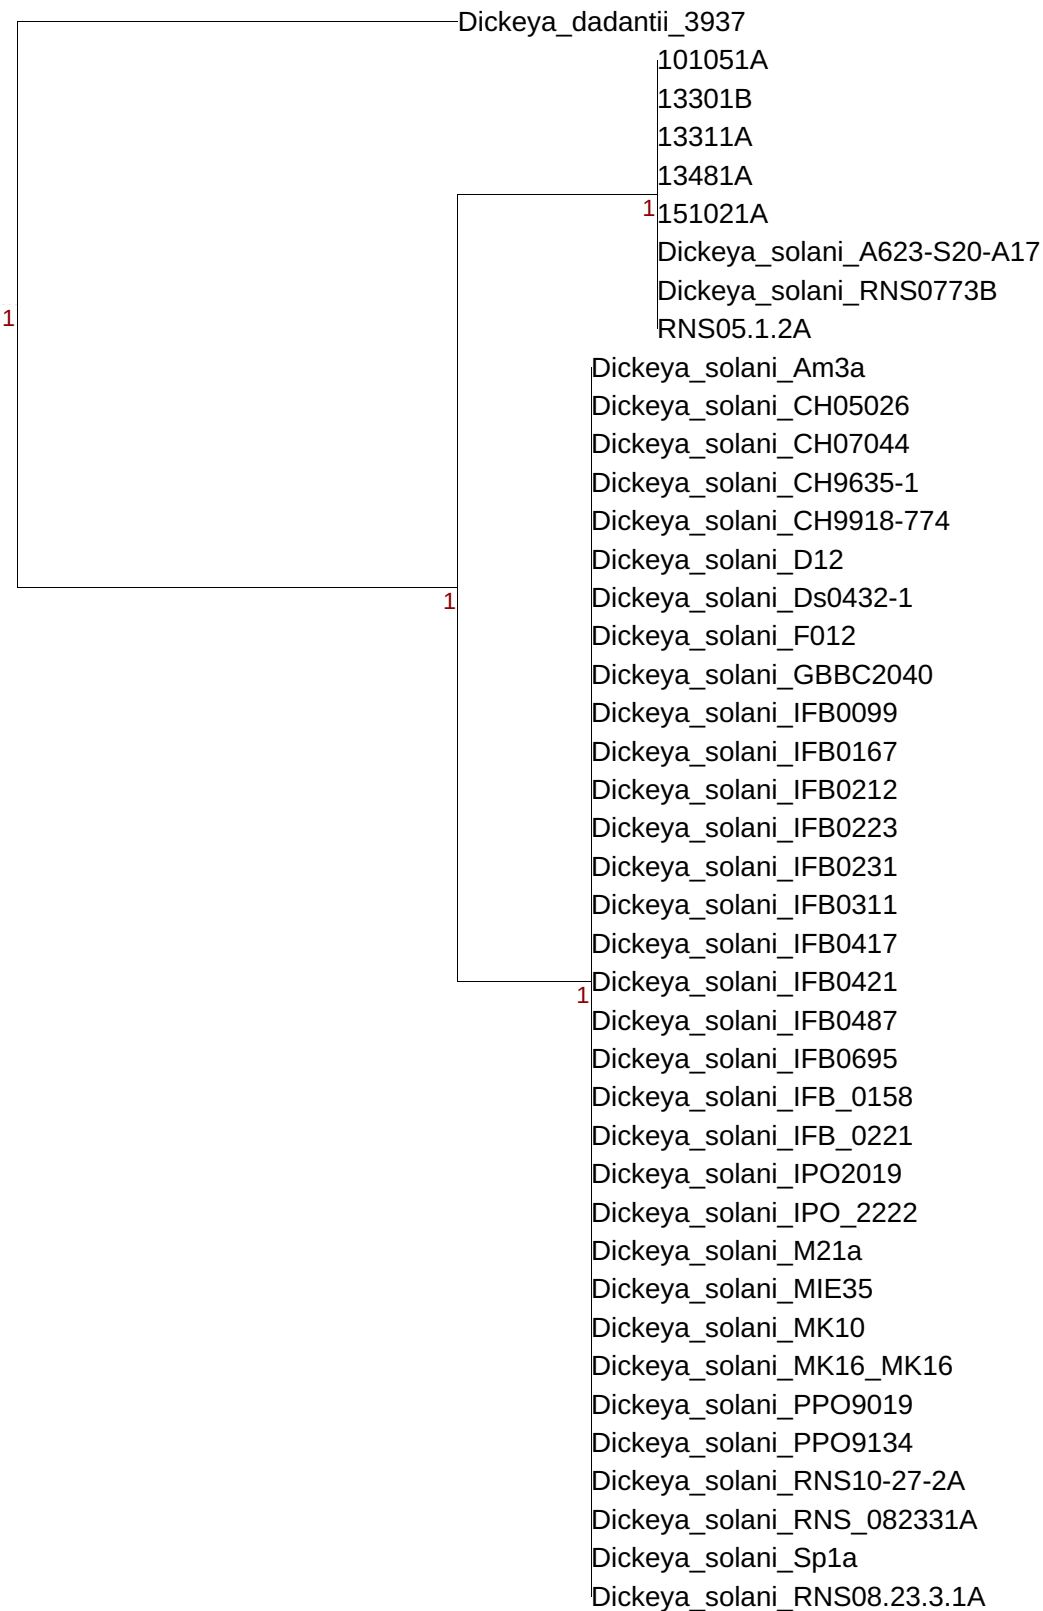

0.0080906

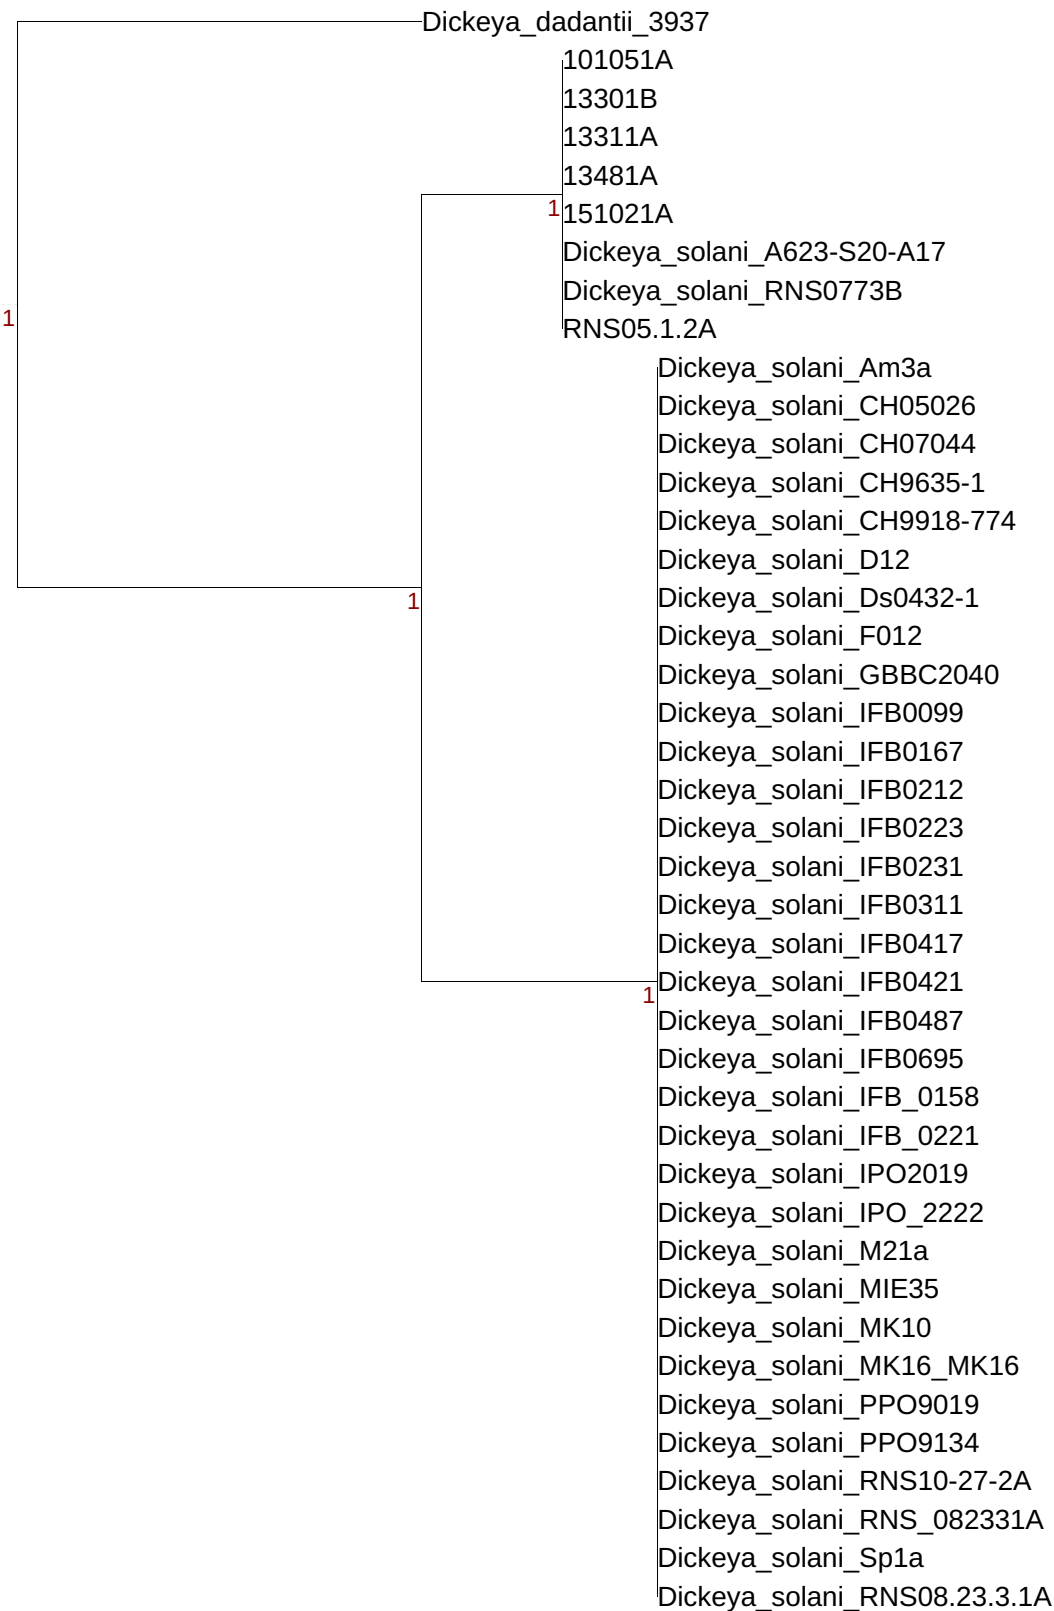

0.00641263

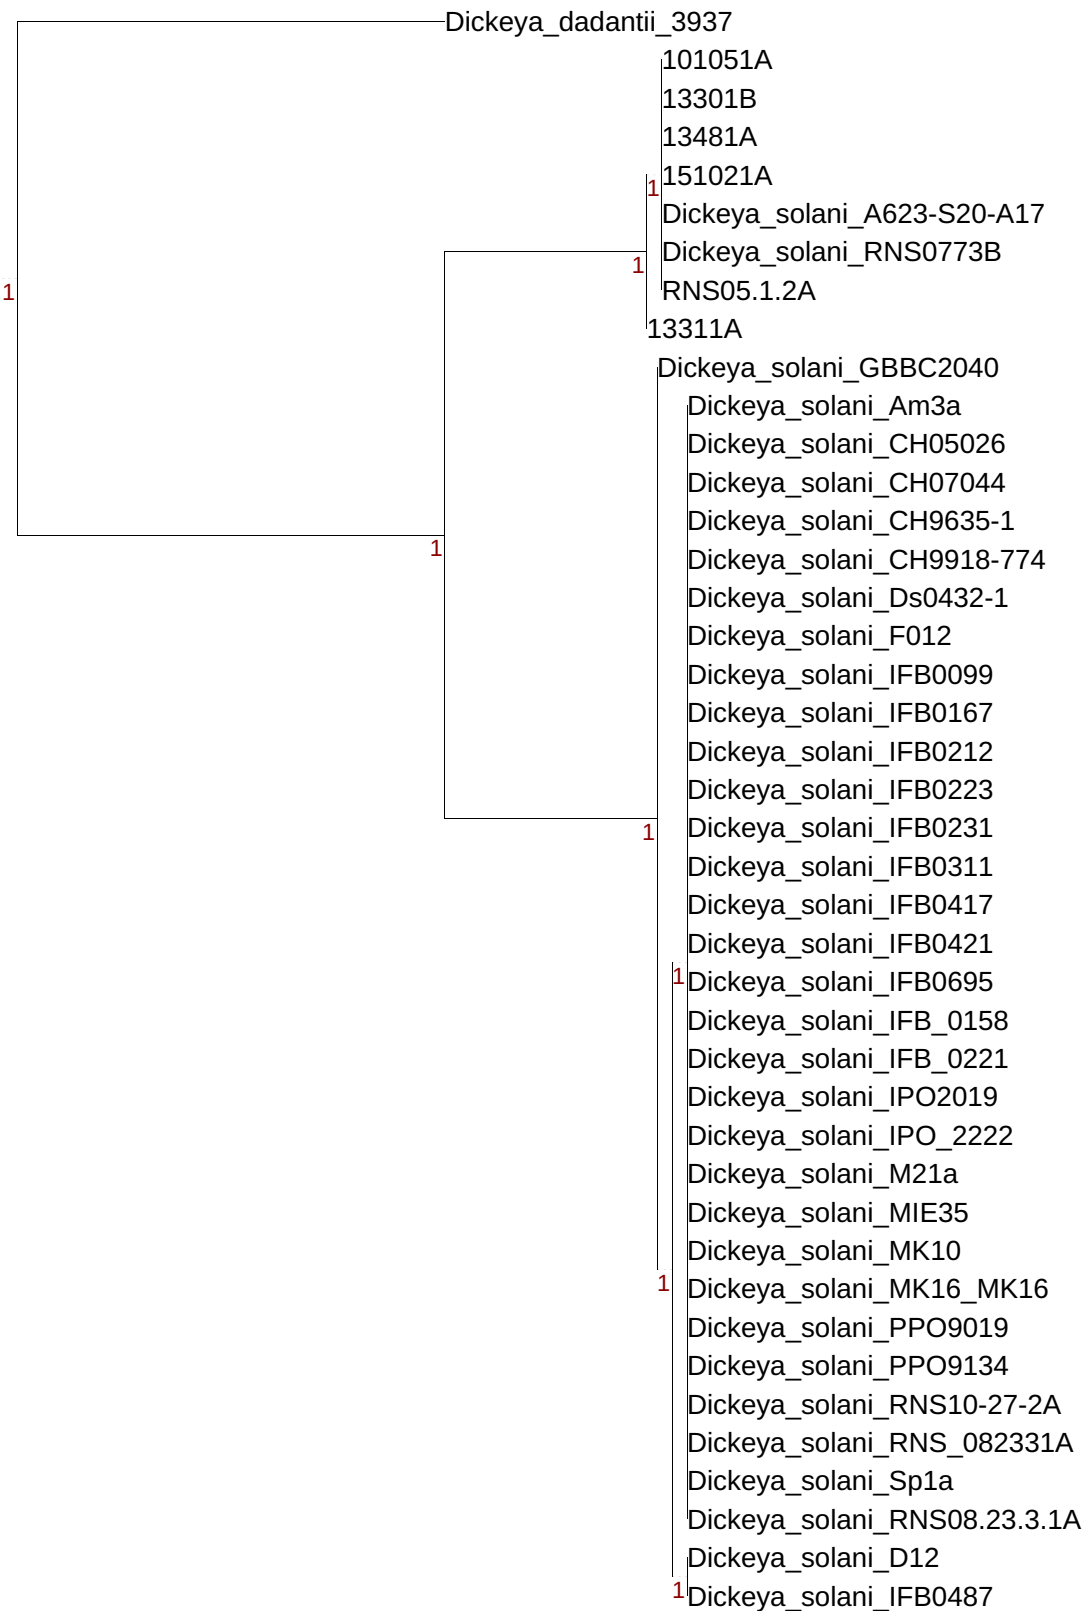

0.0083787

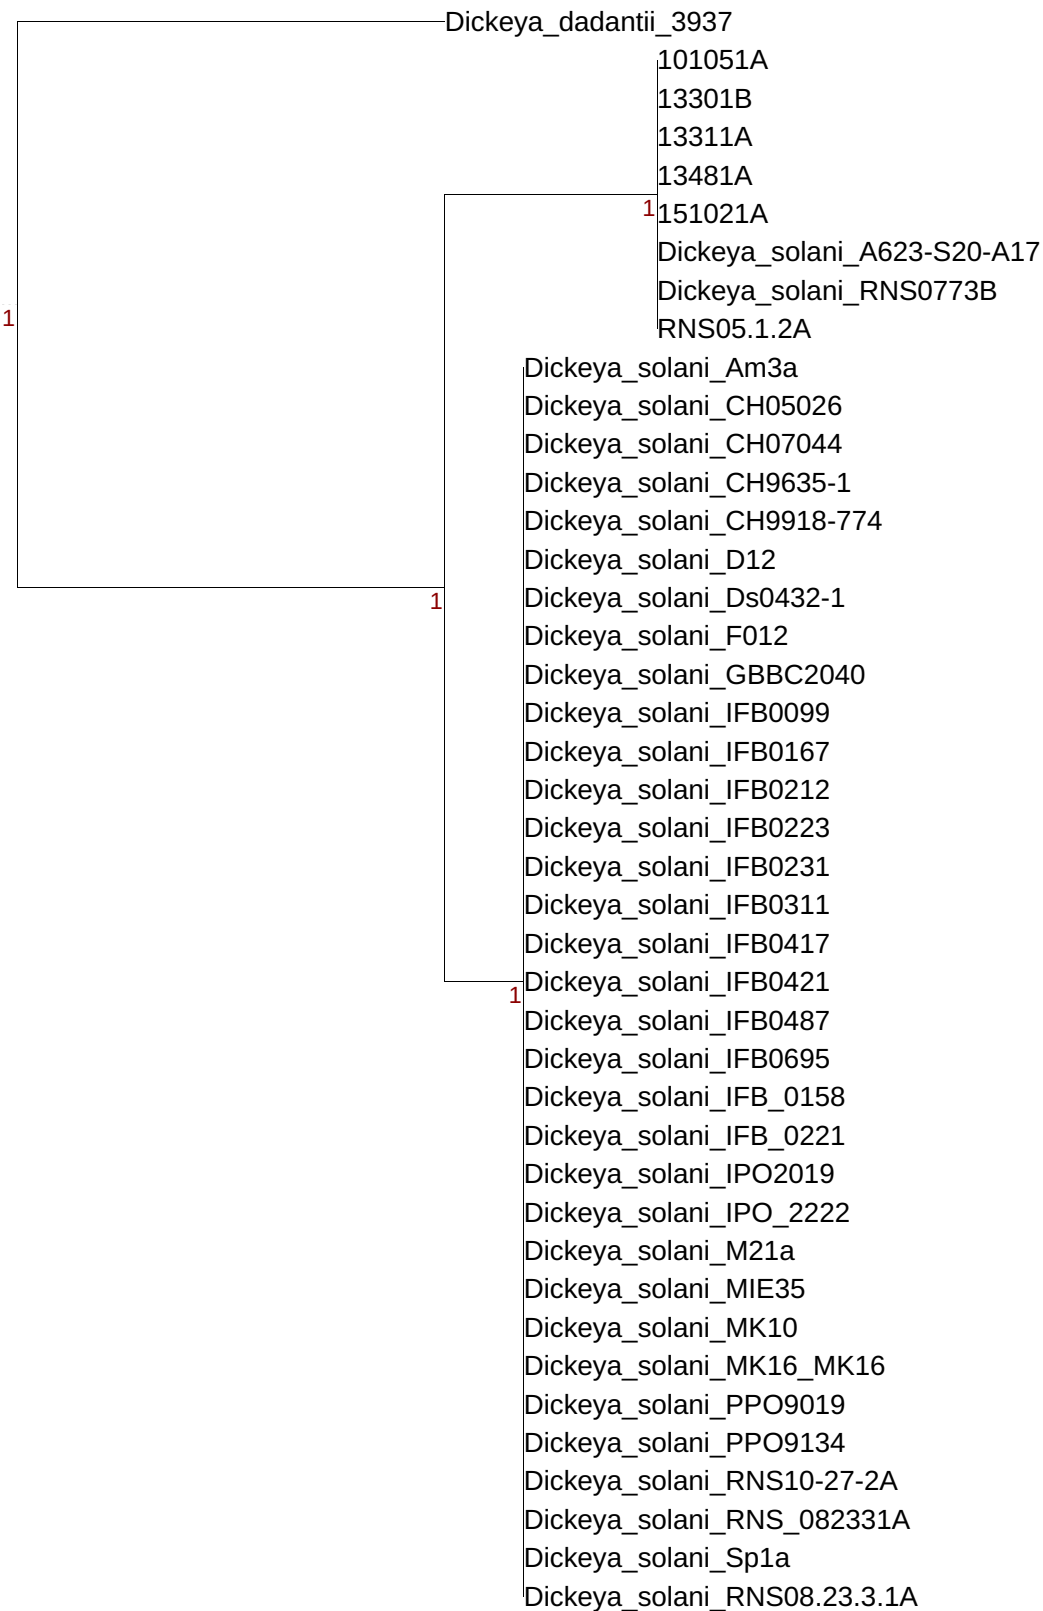

0.0062784

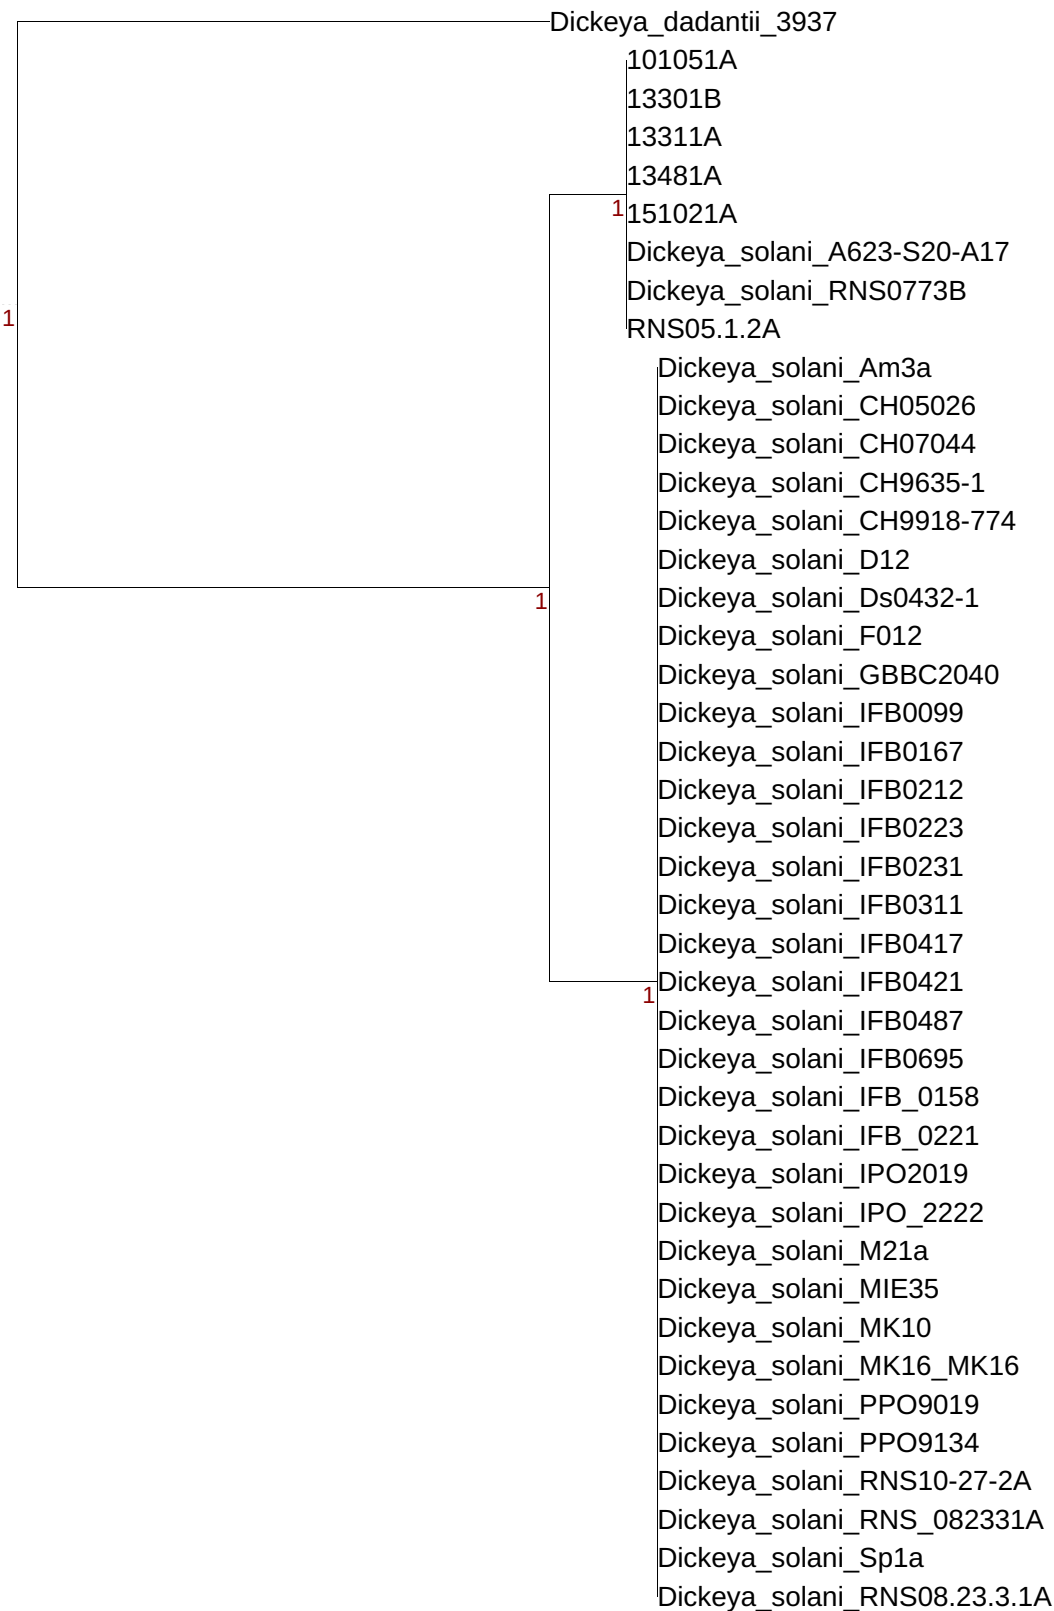

0.0087191

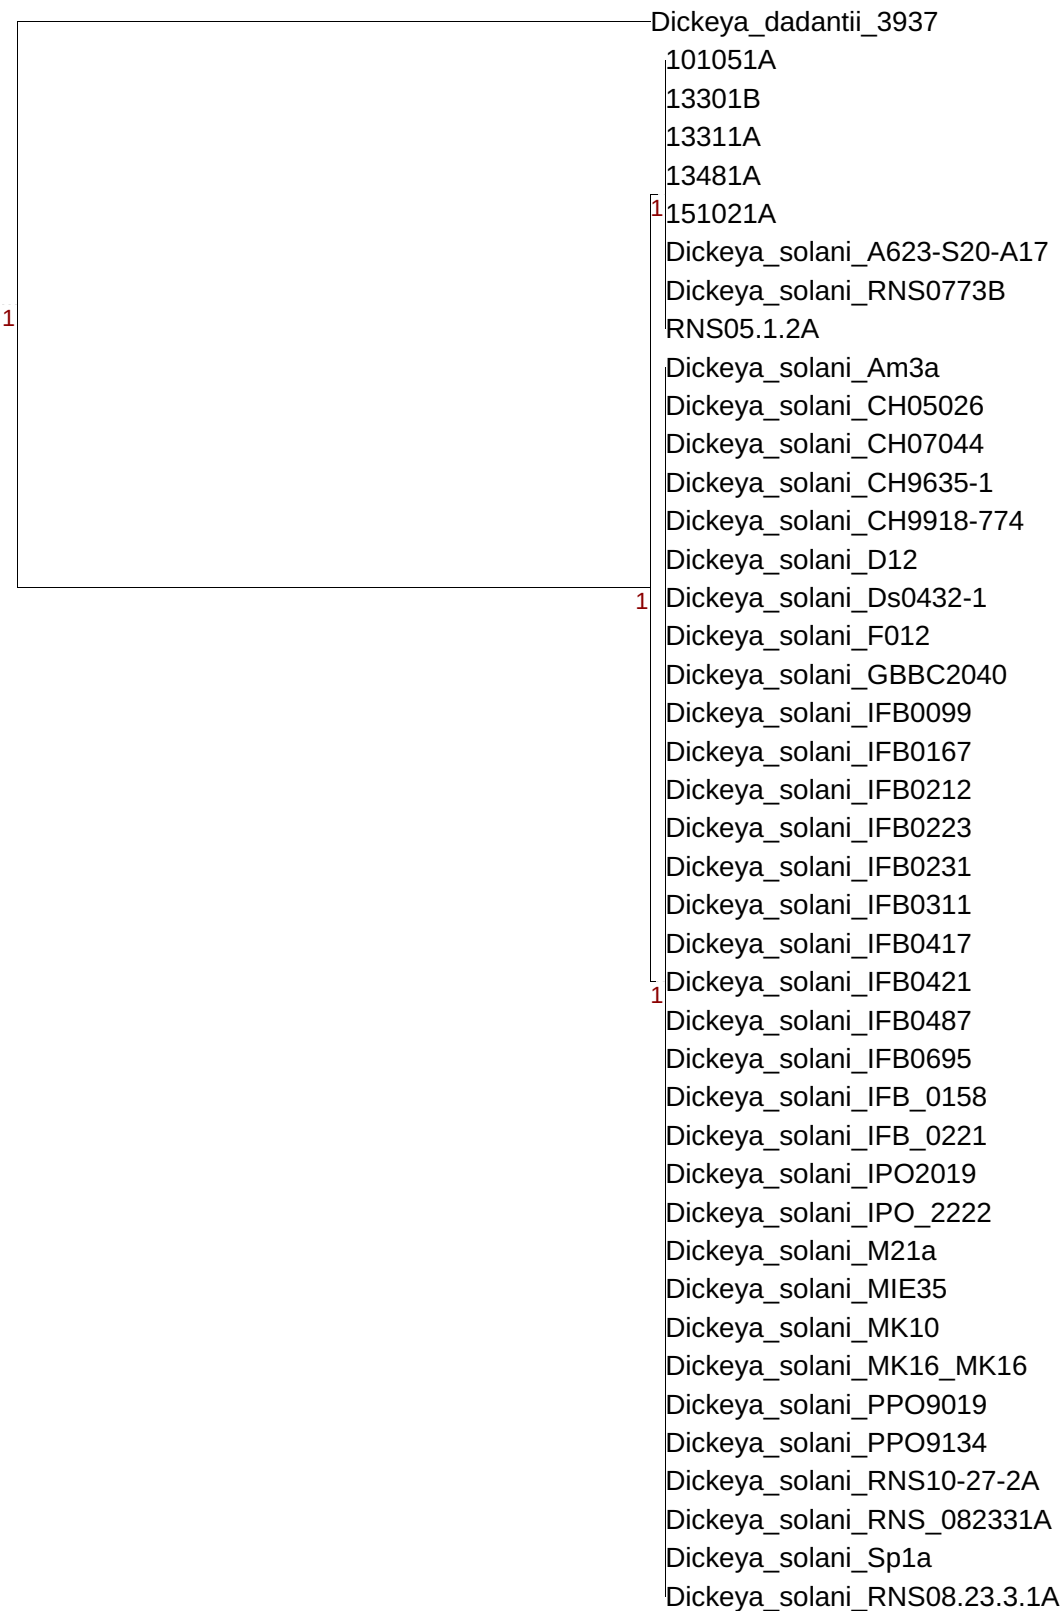

0.129441

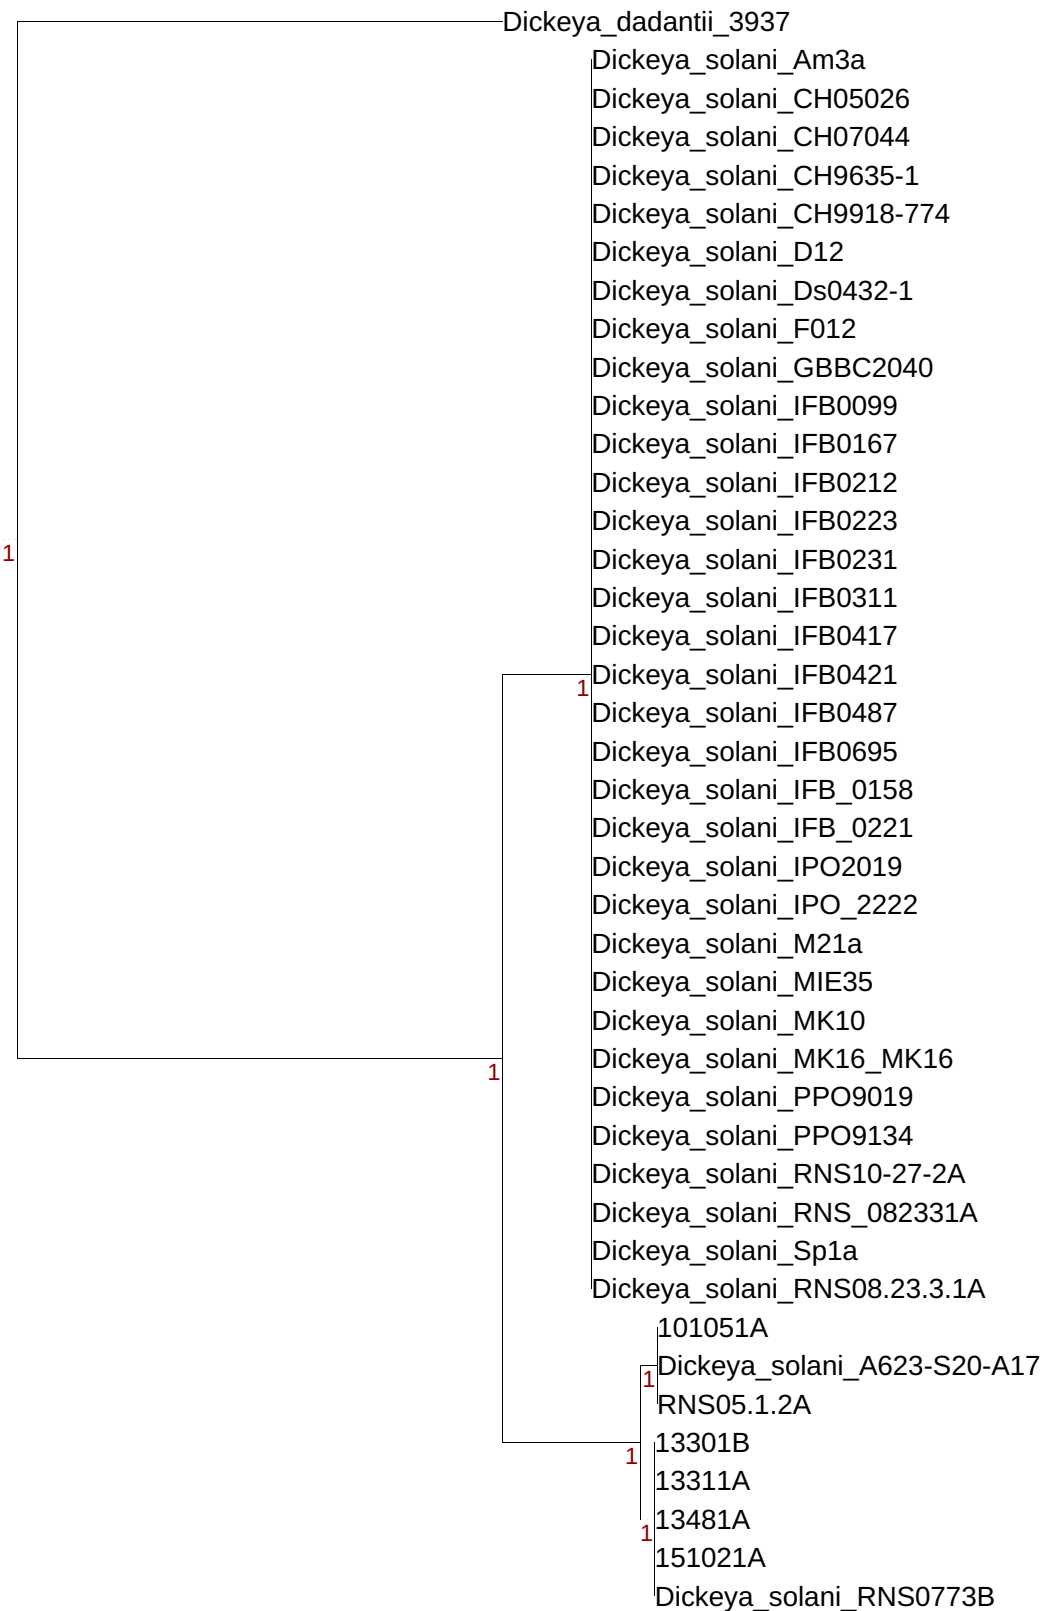

0.00646084



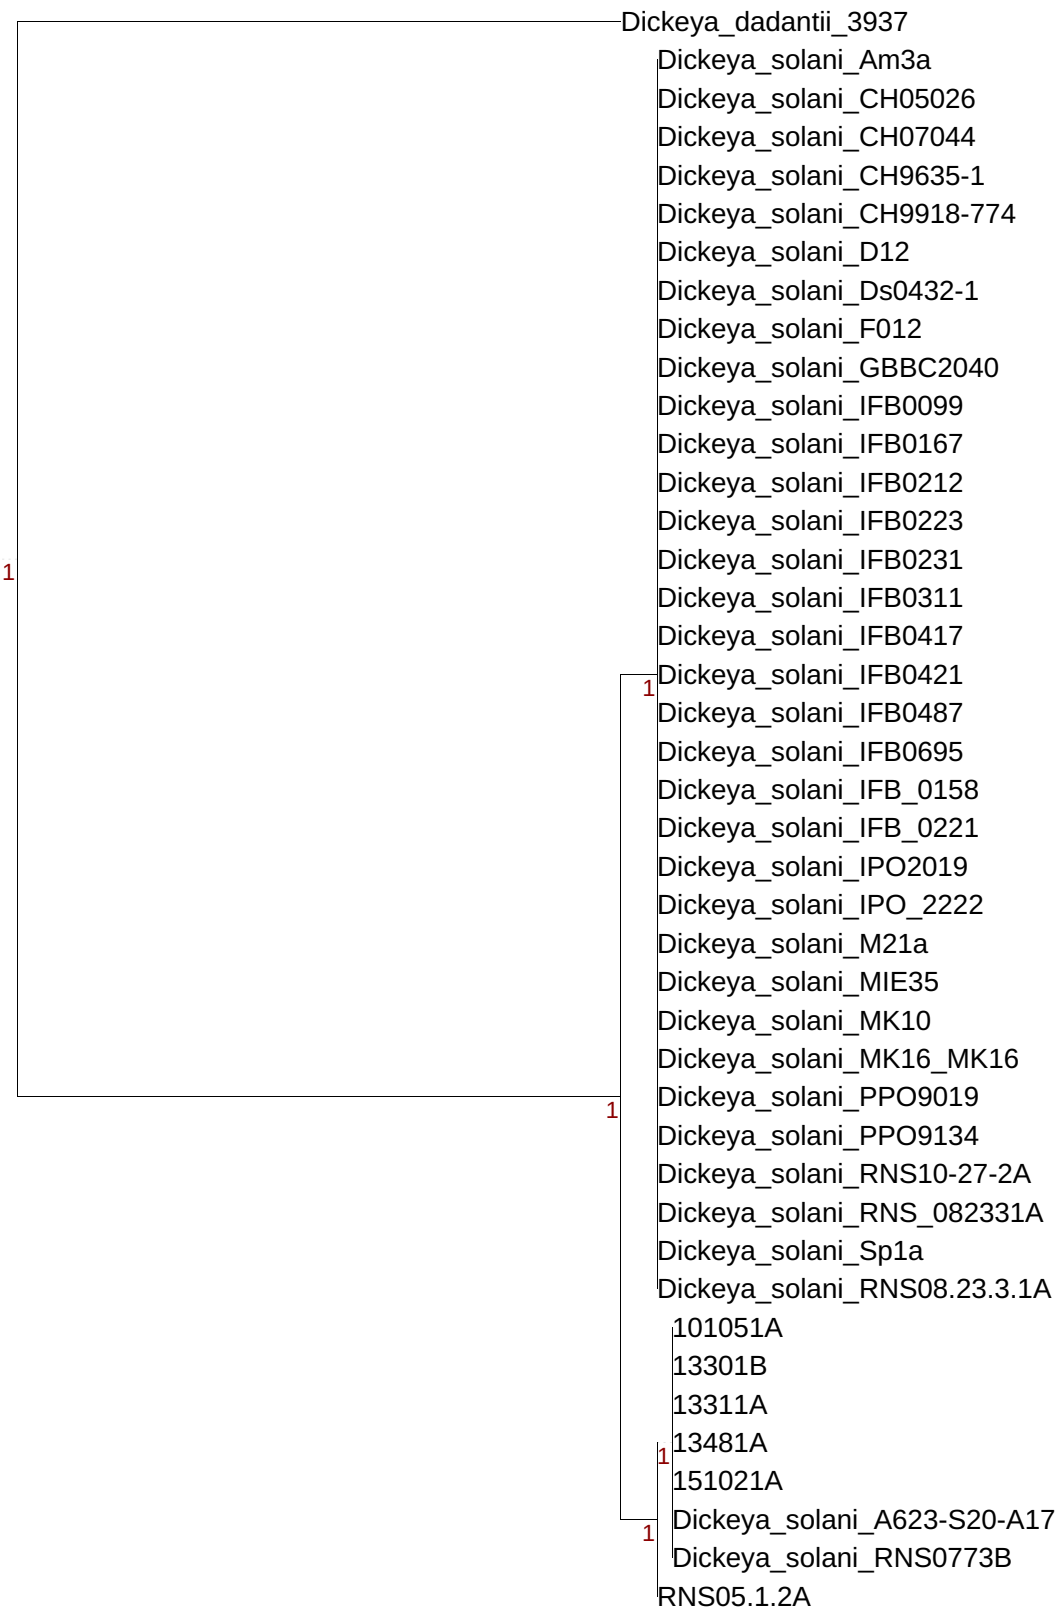

0.0208003

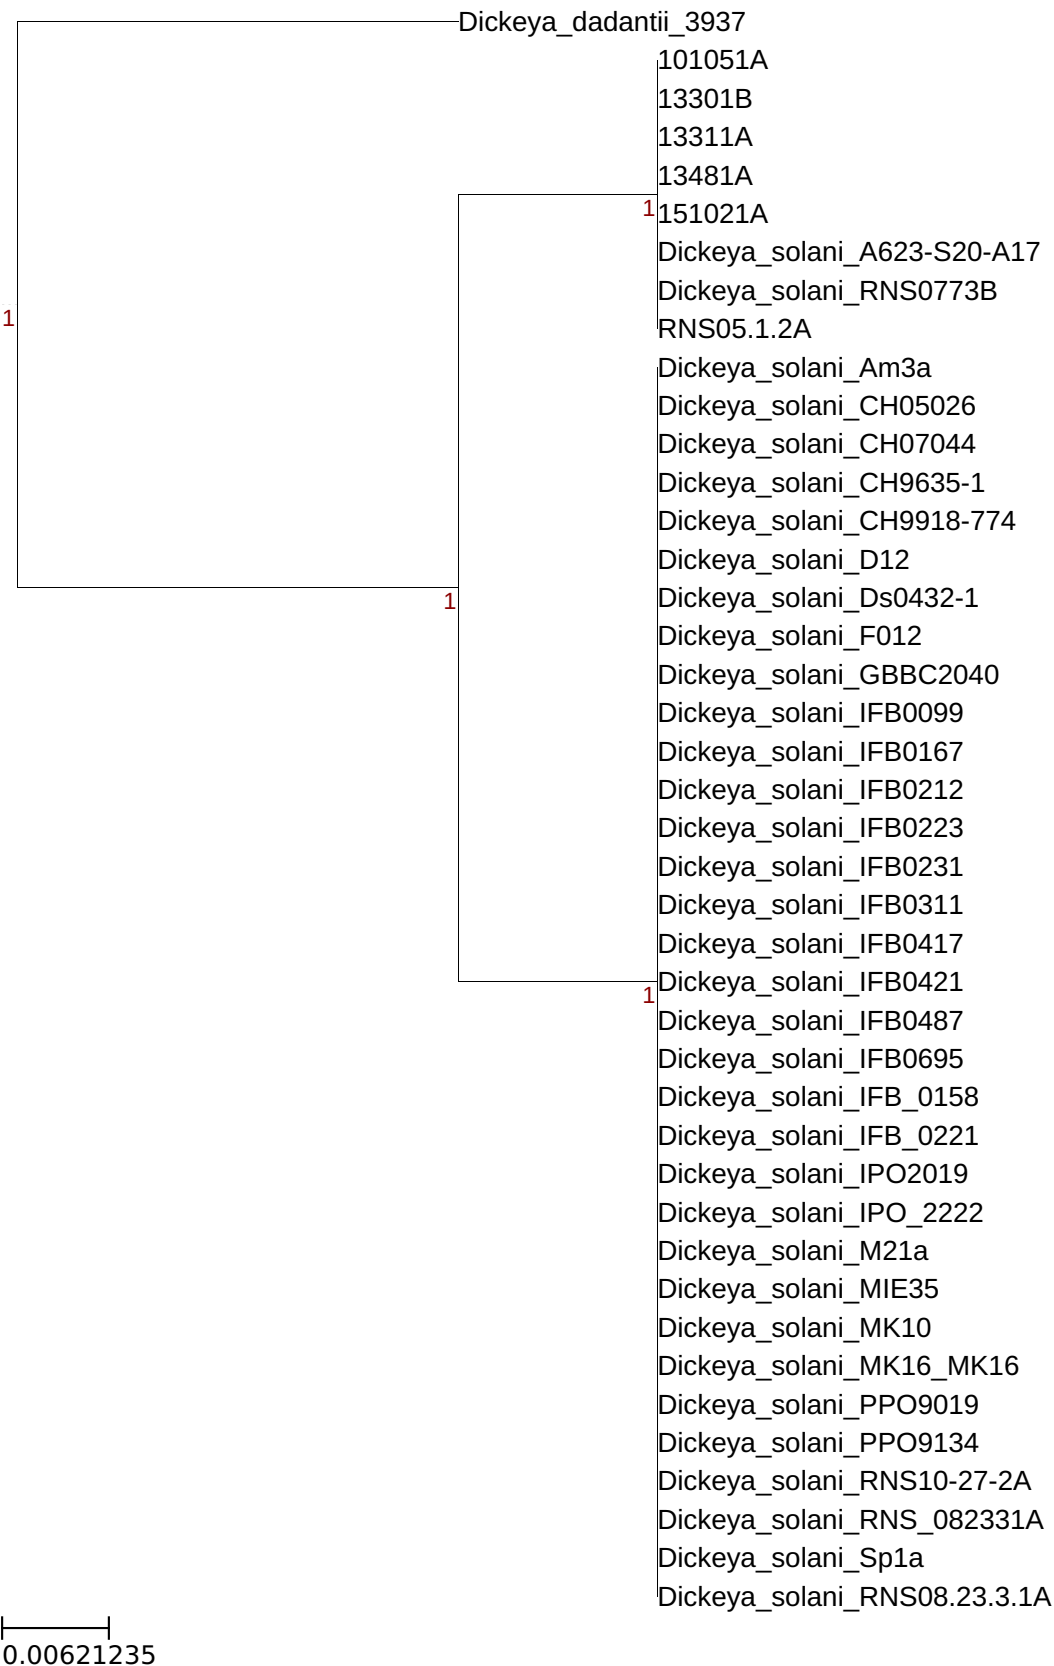

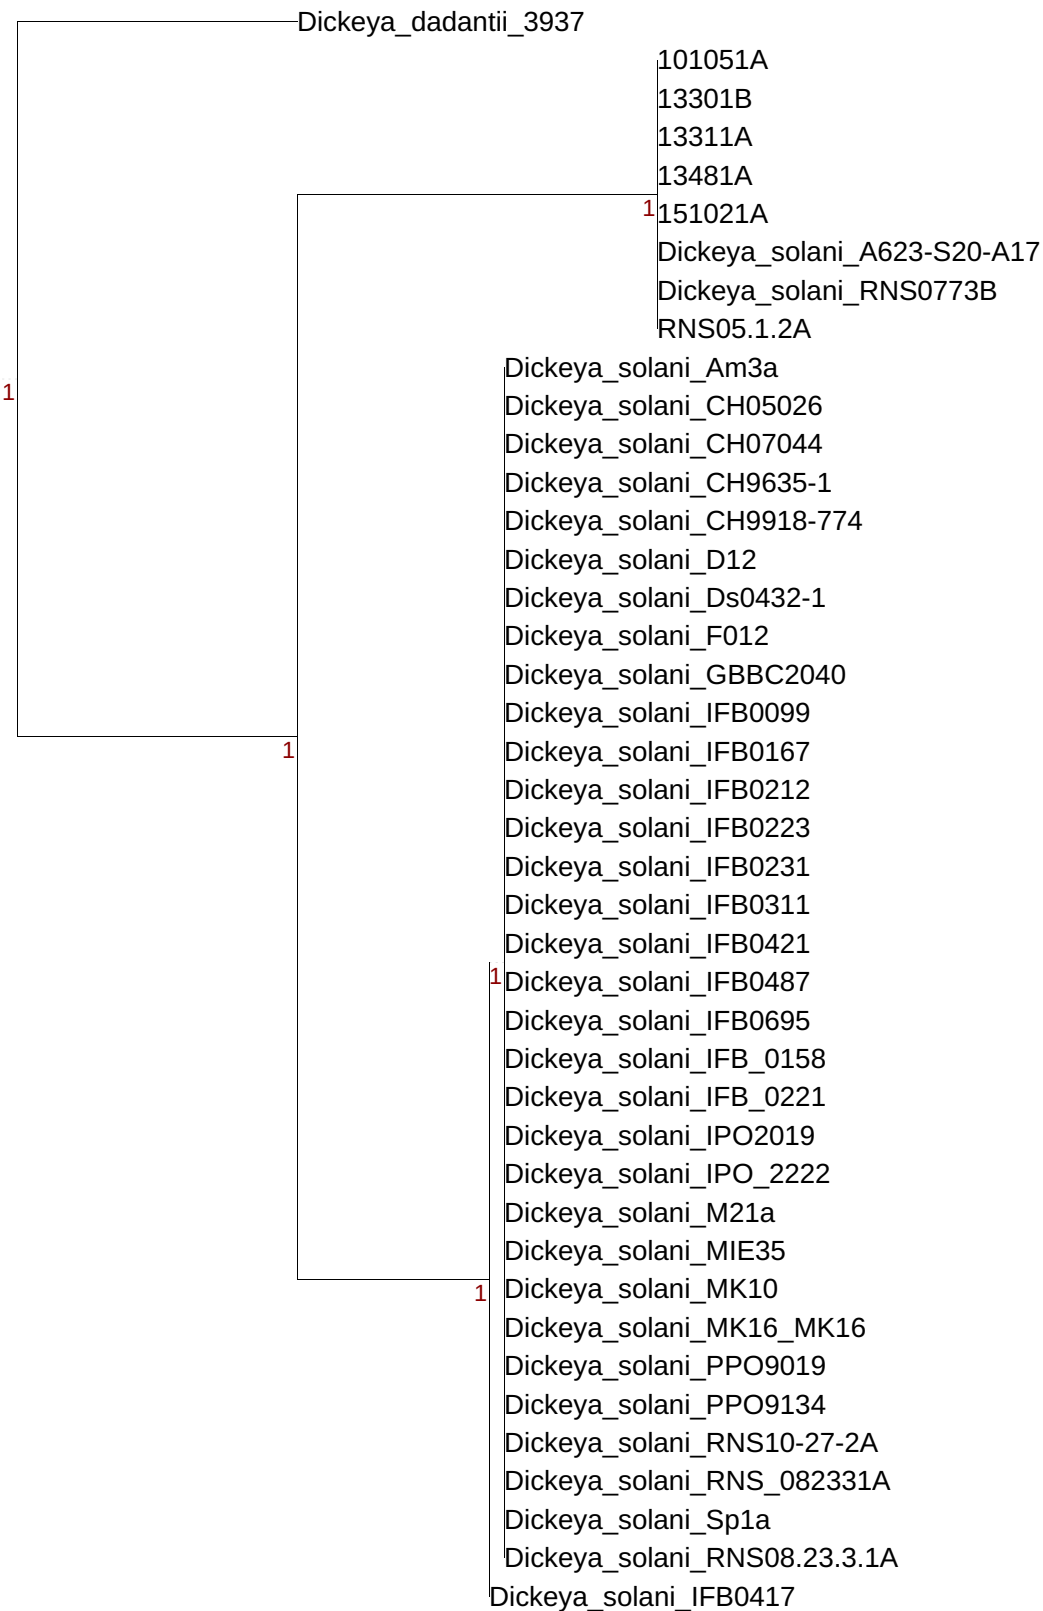

0.00359481

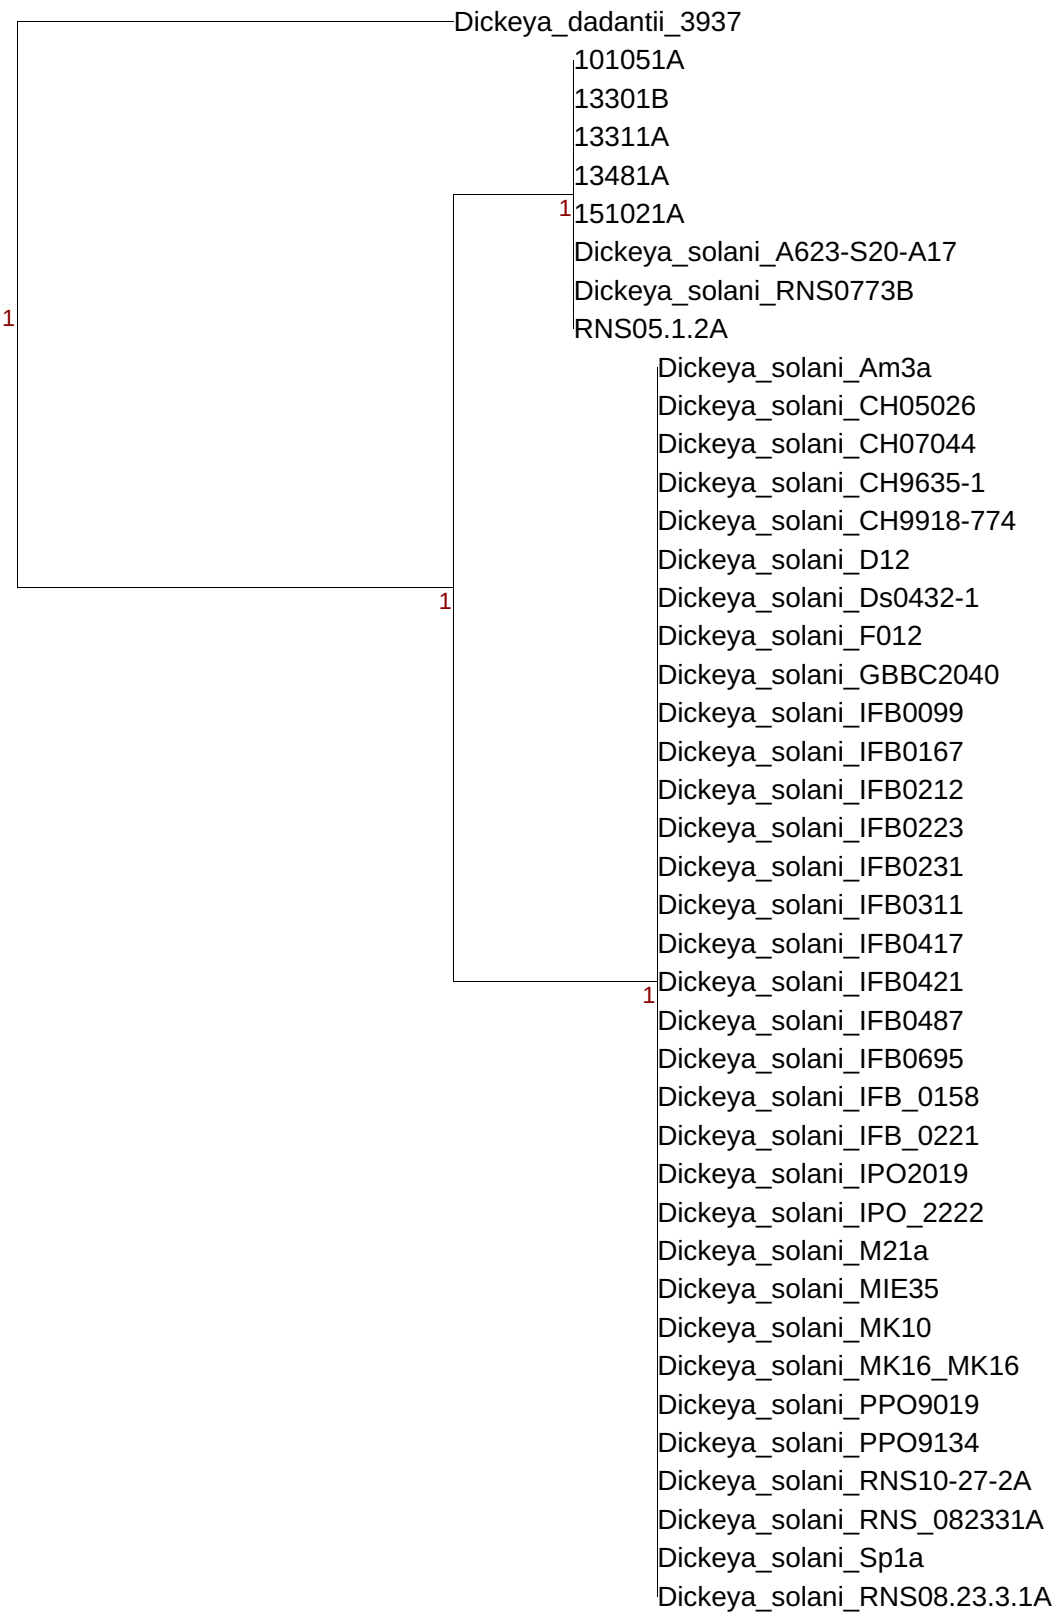

0.00733405

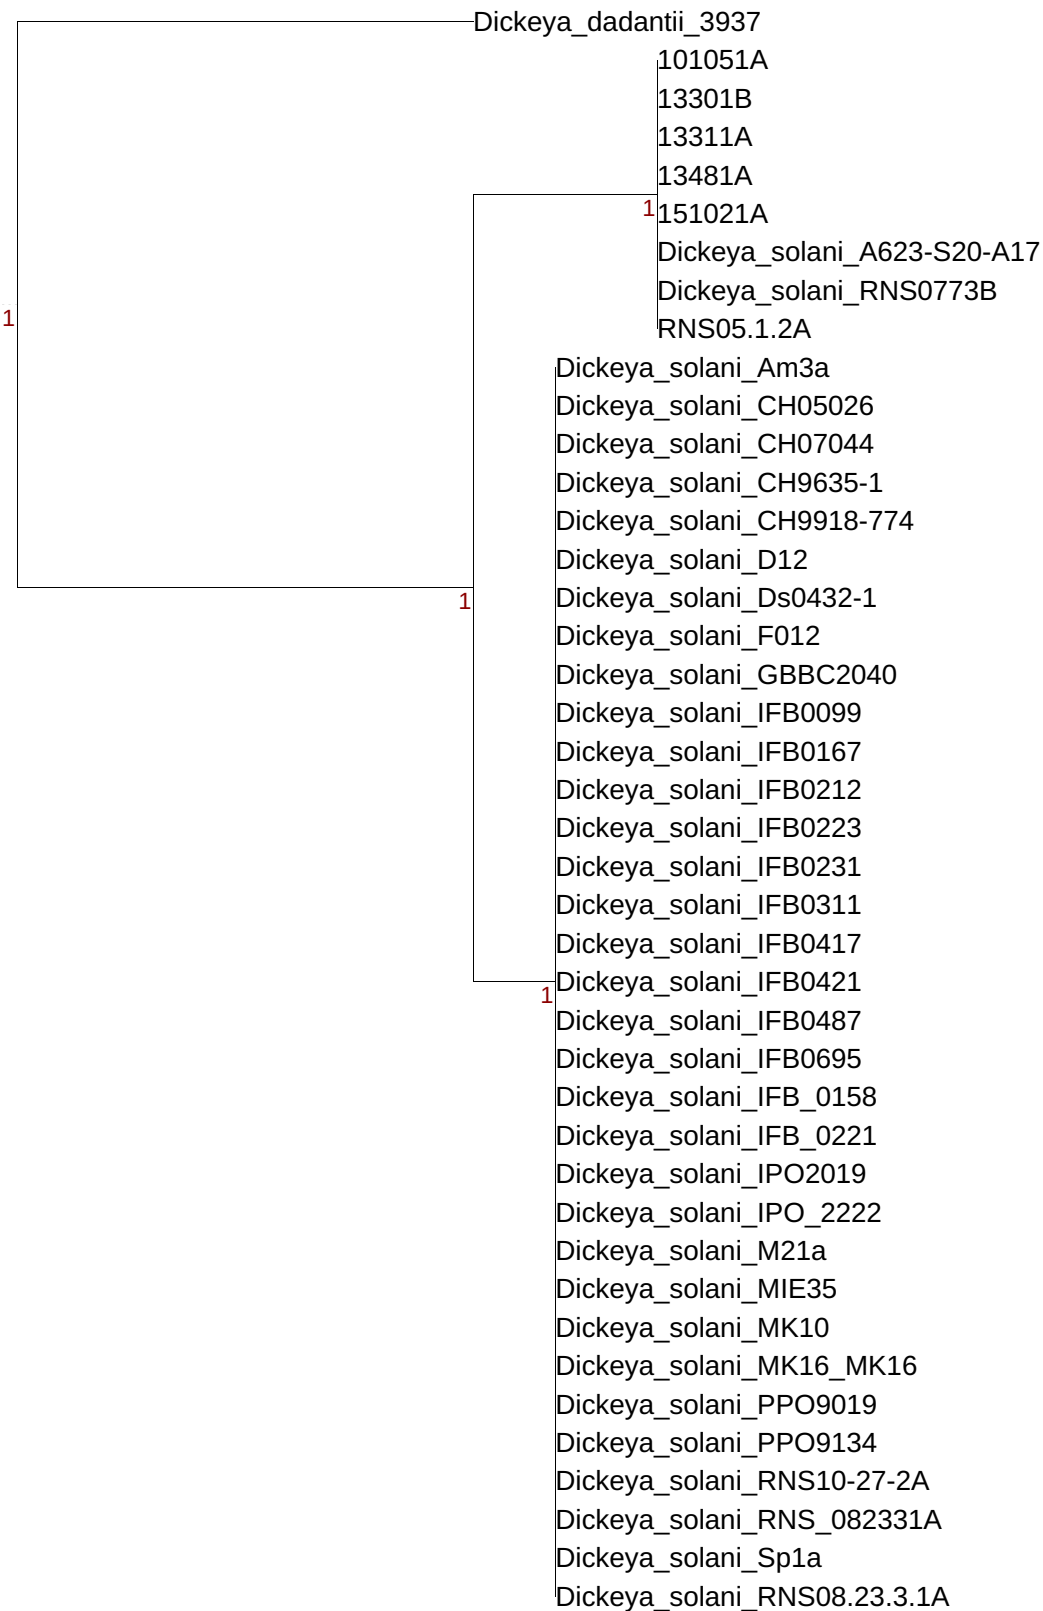

0.00639052

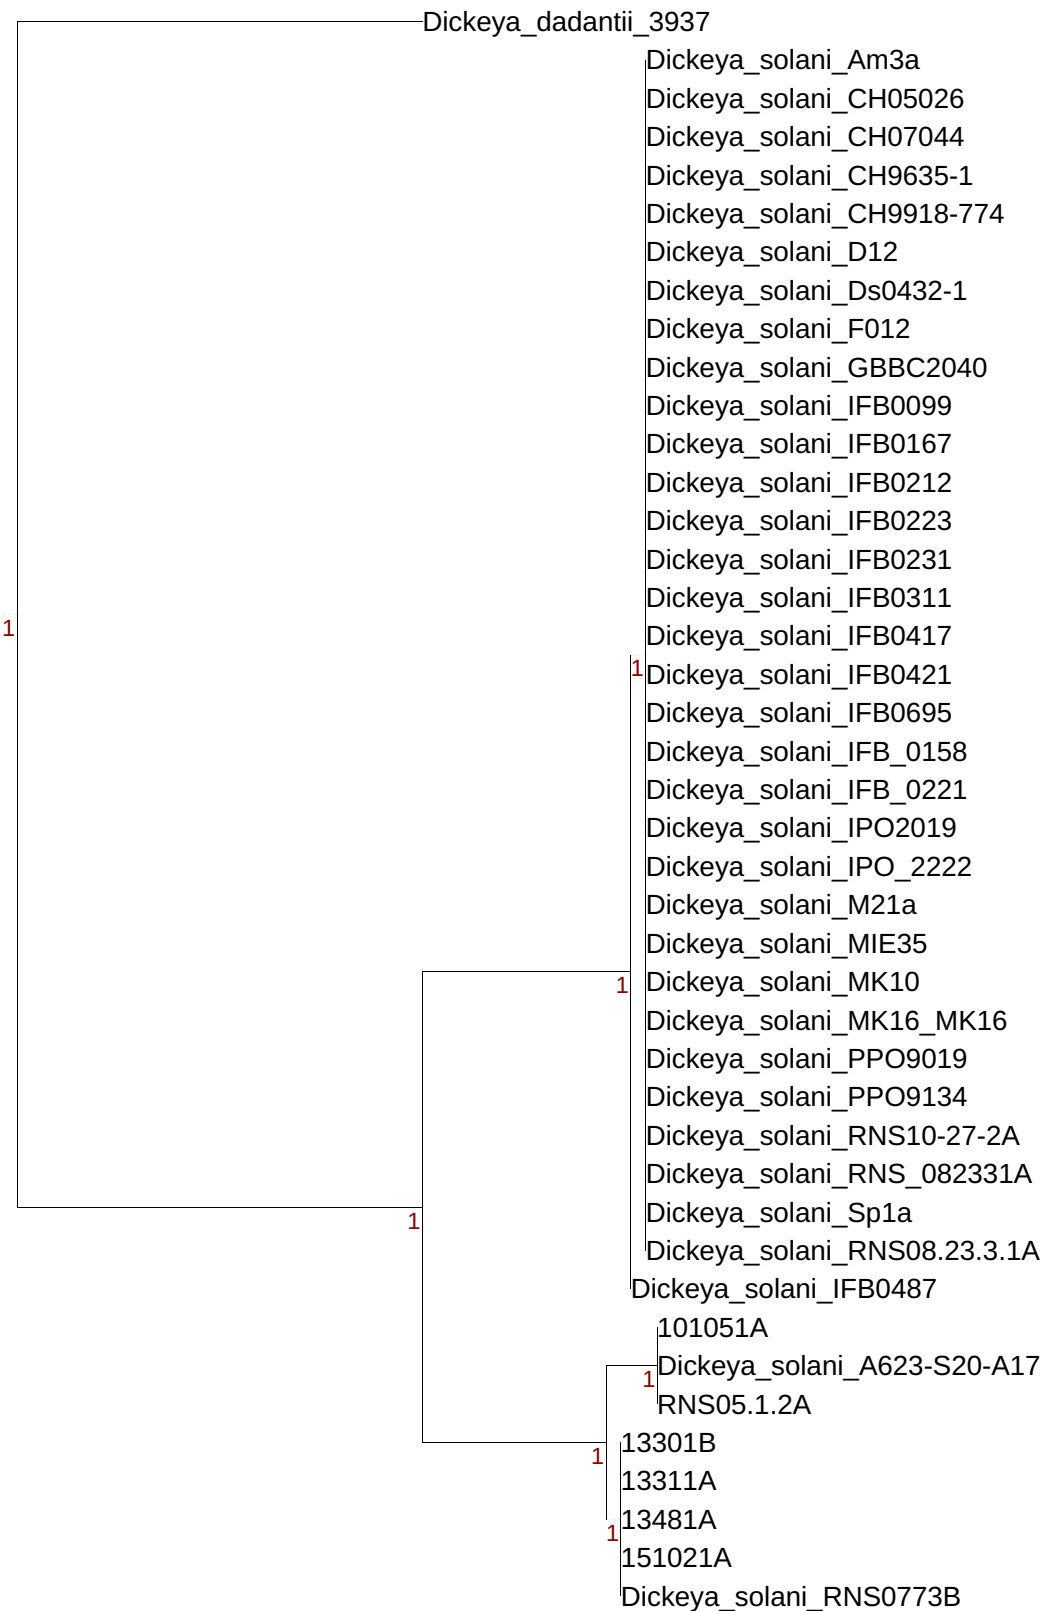

0.00496049

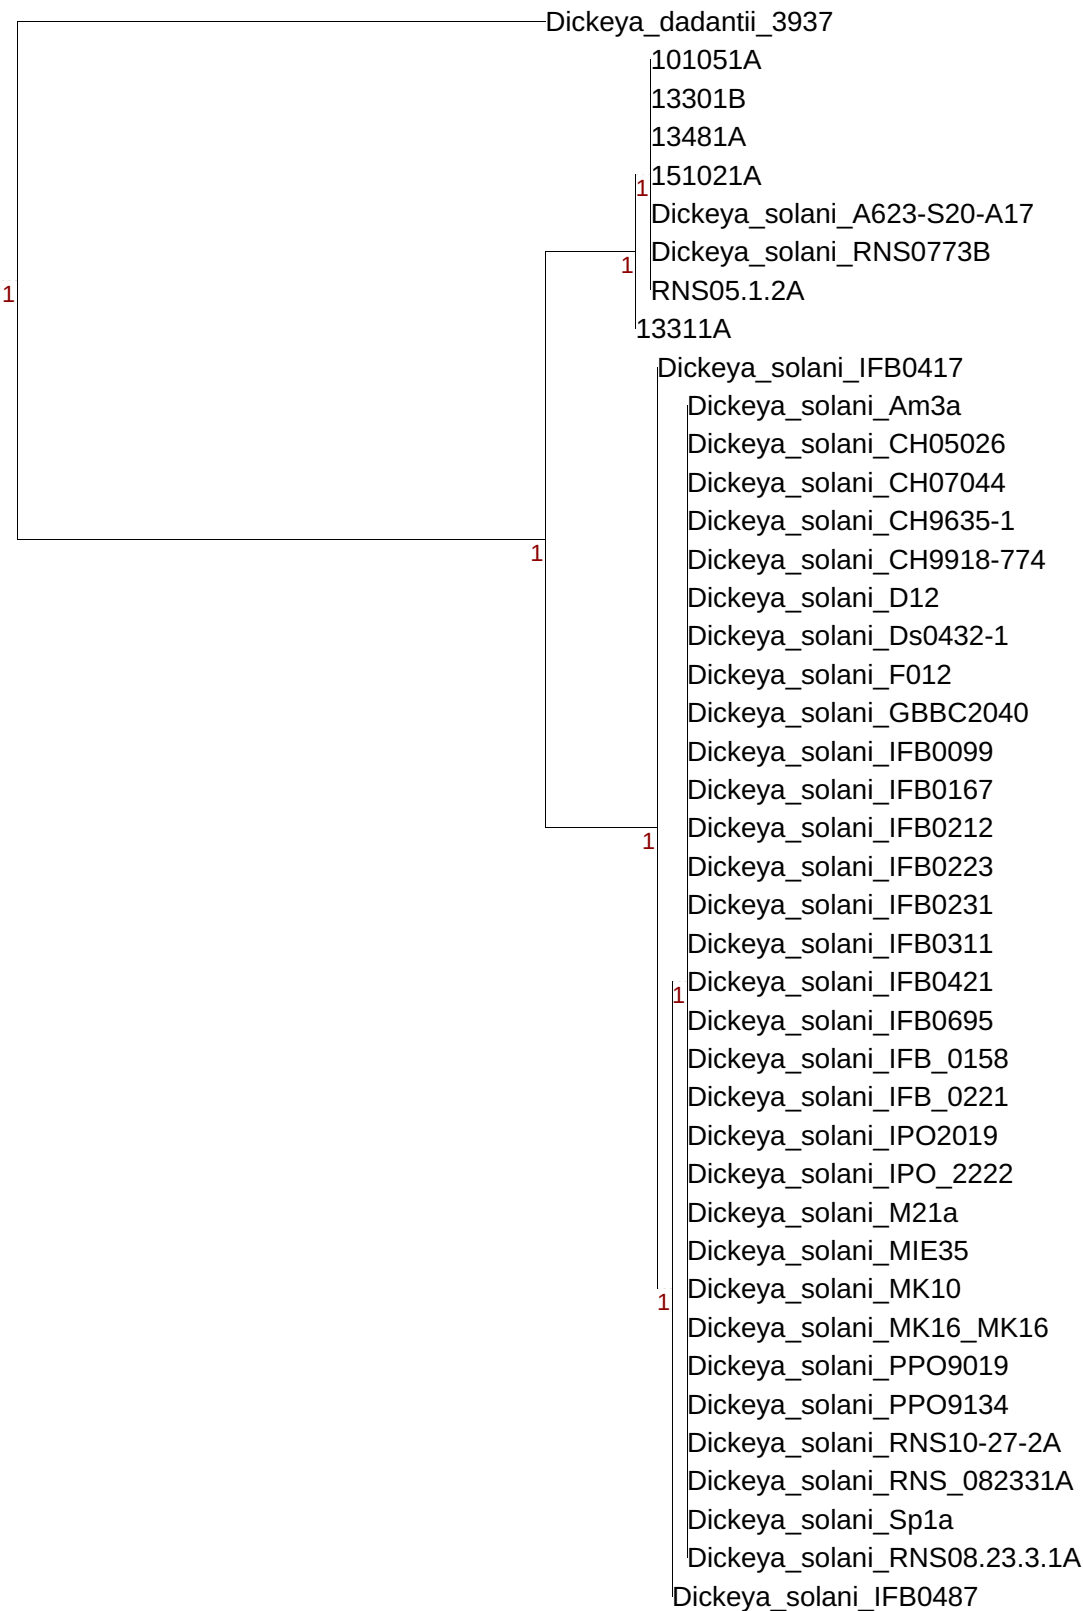

0.00749617

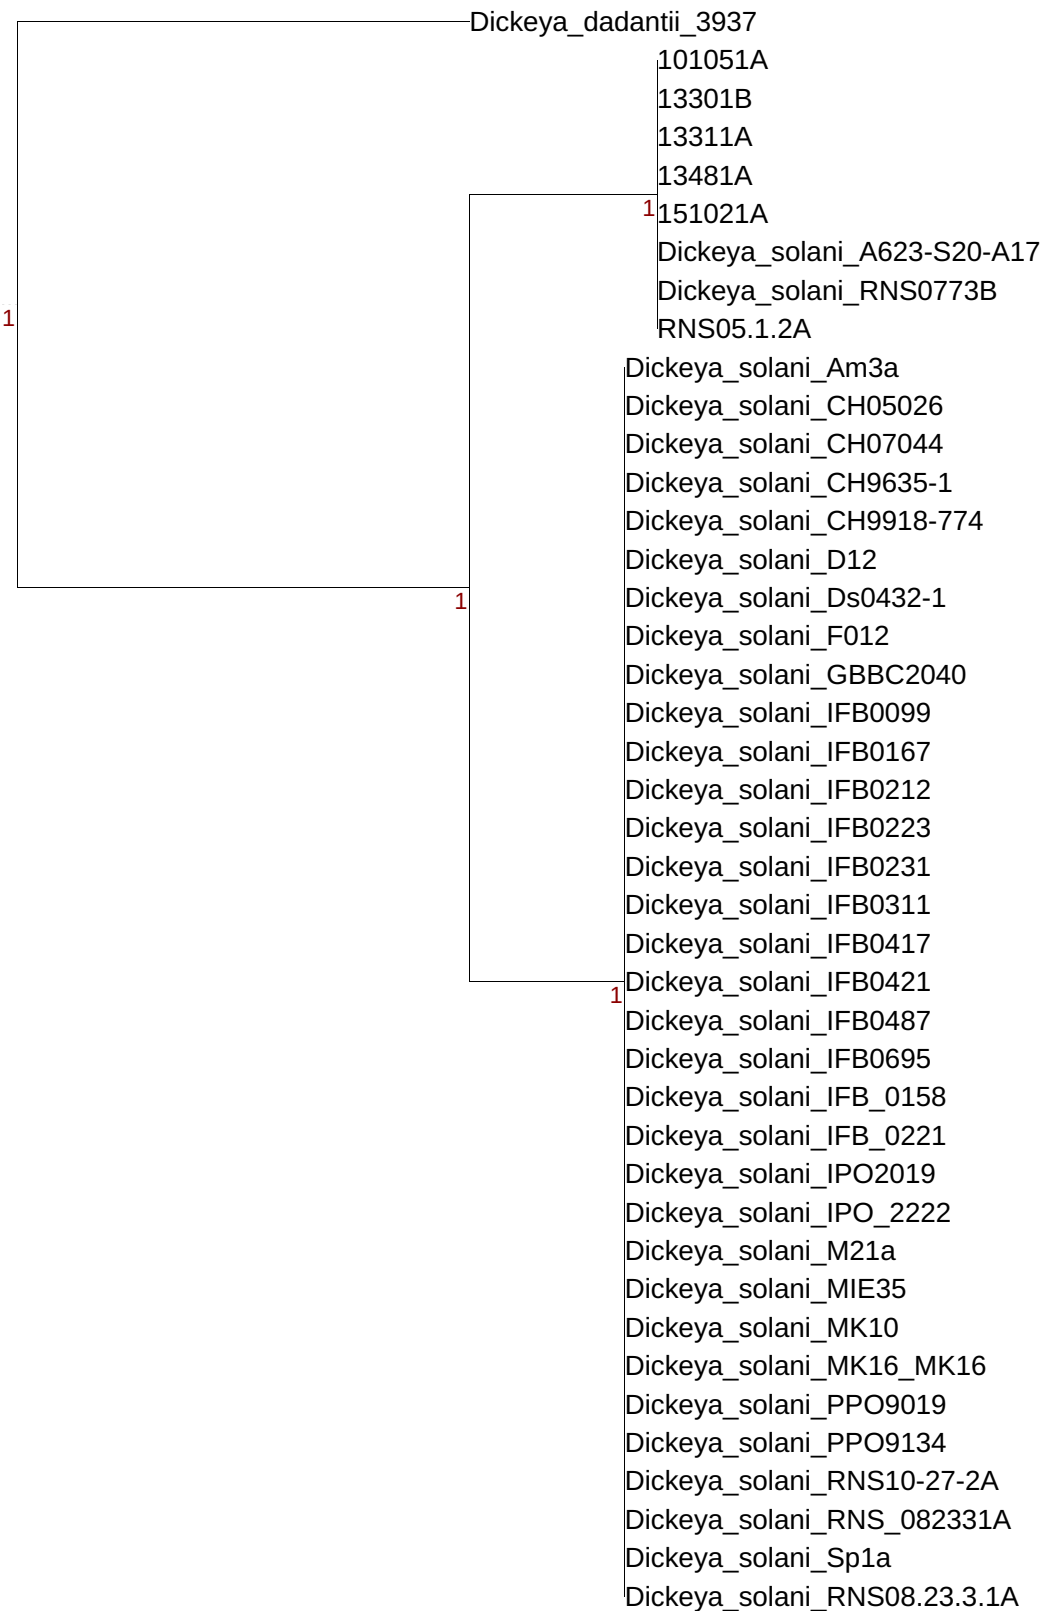

0.00463169



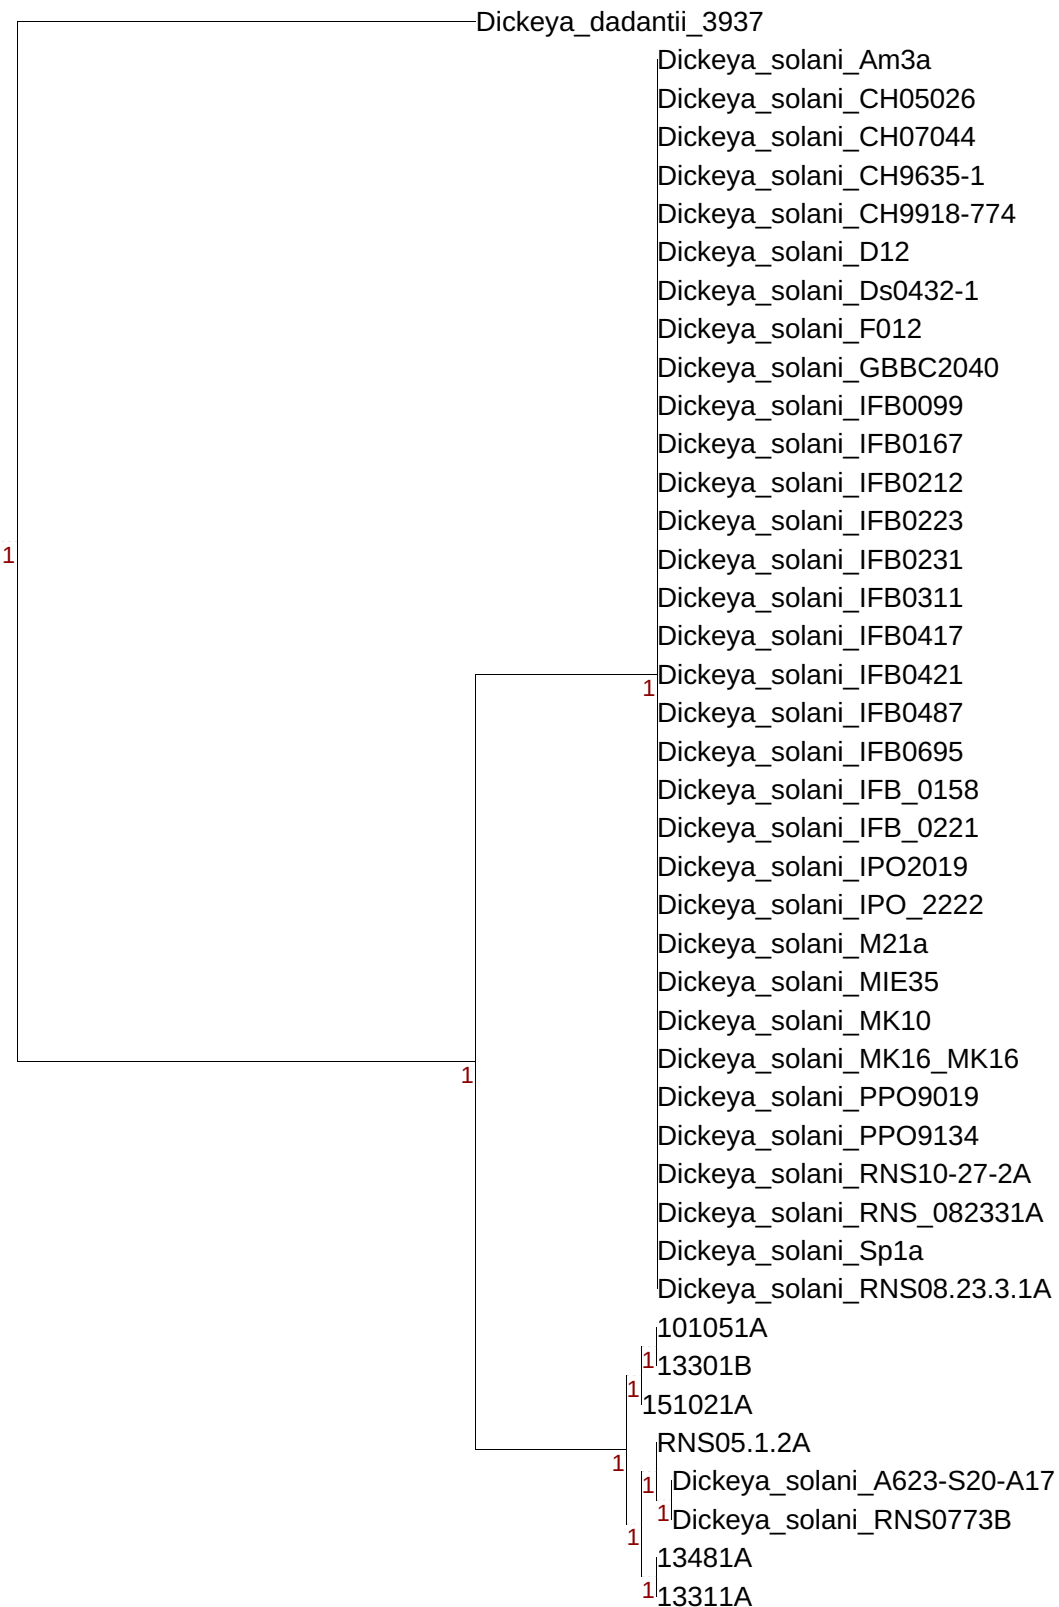

0.00590498

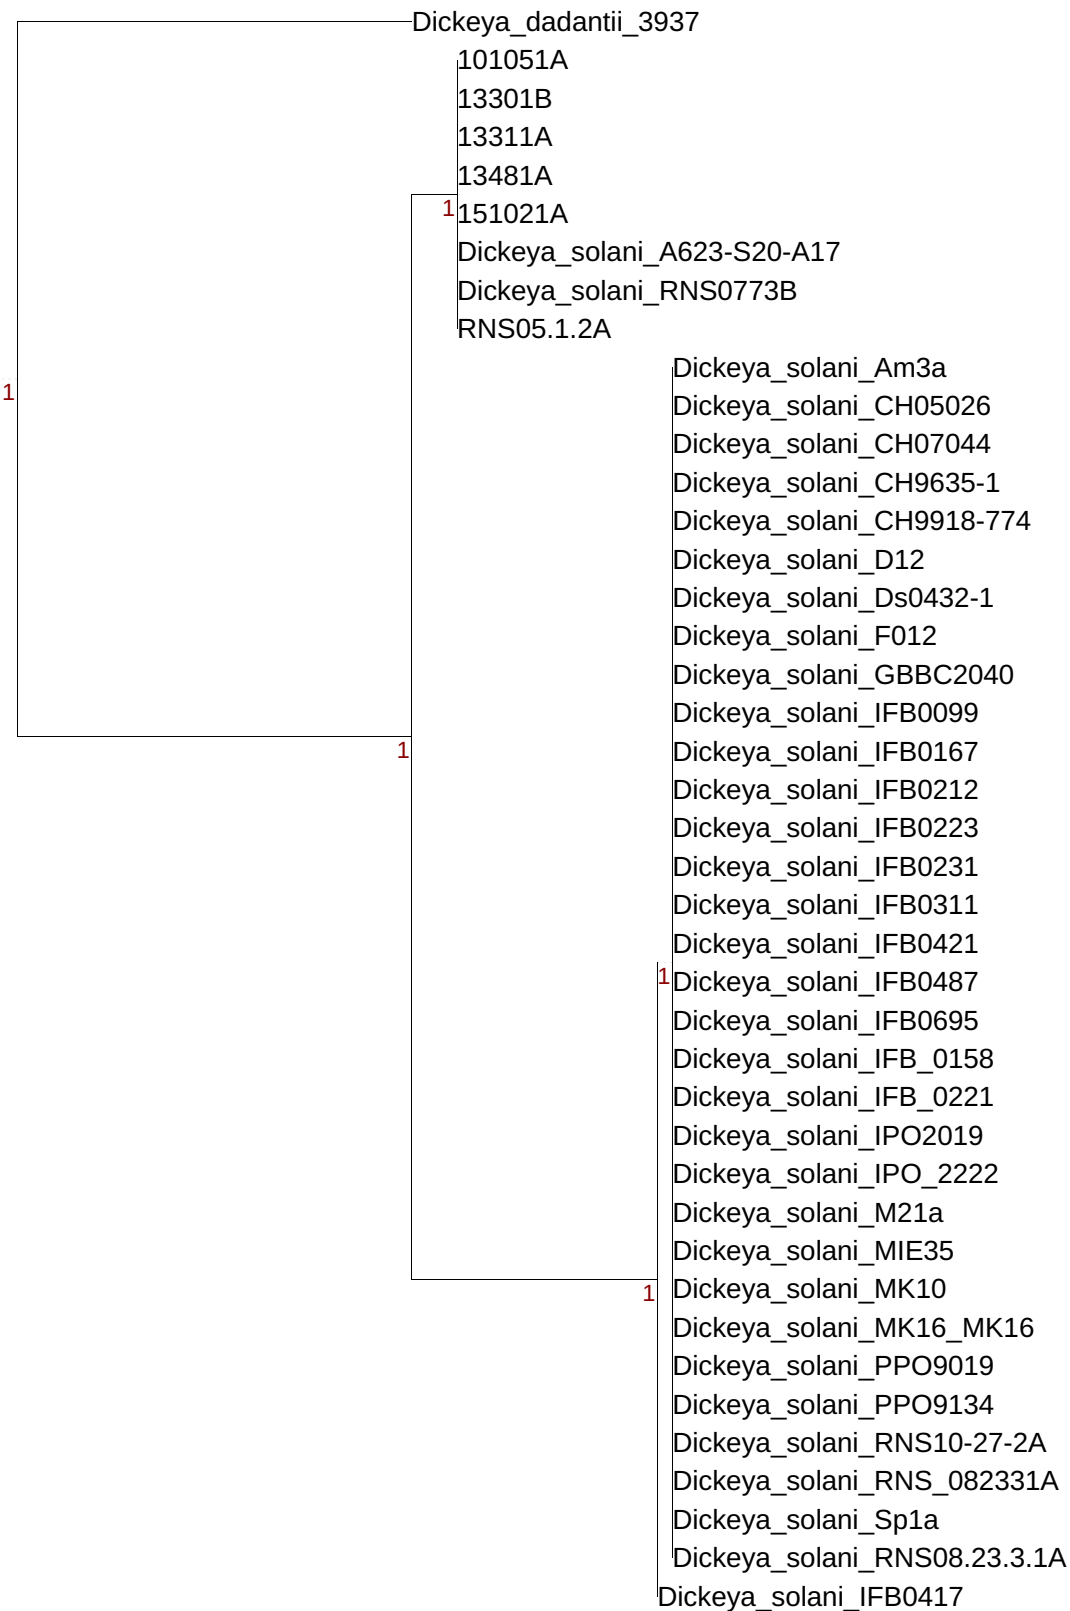

0.00528762

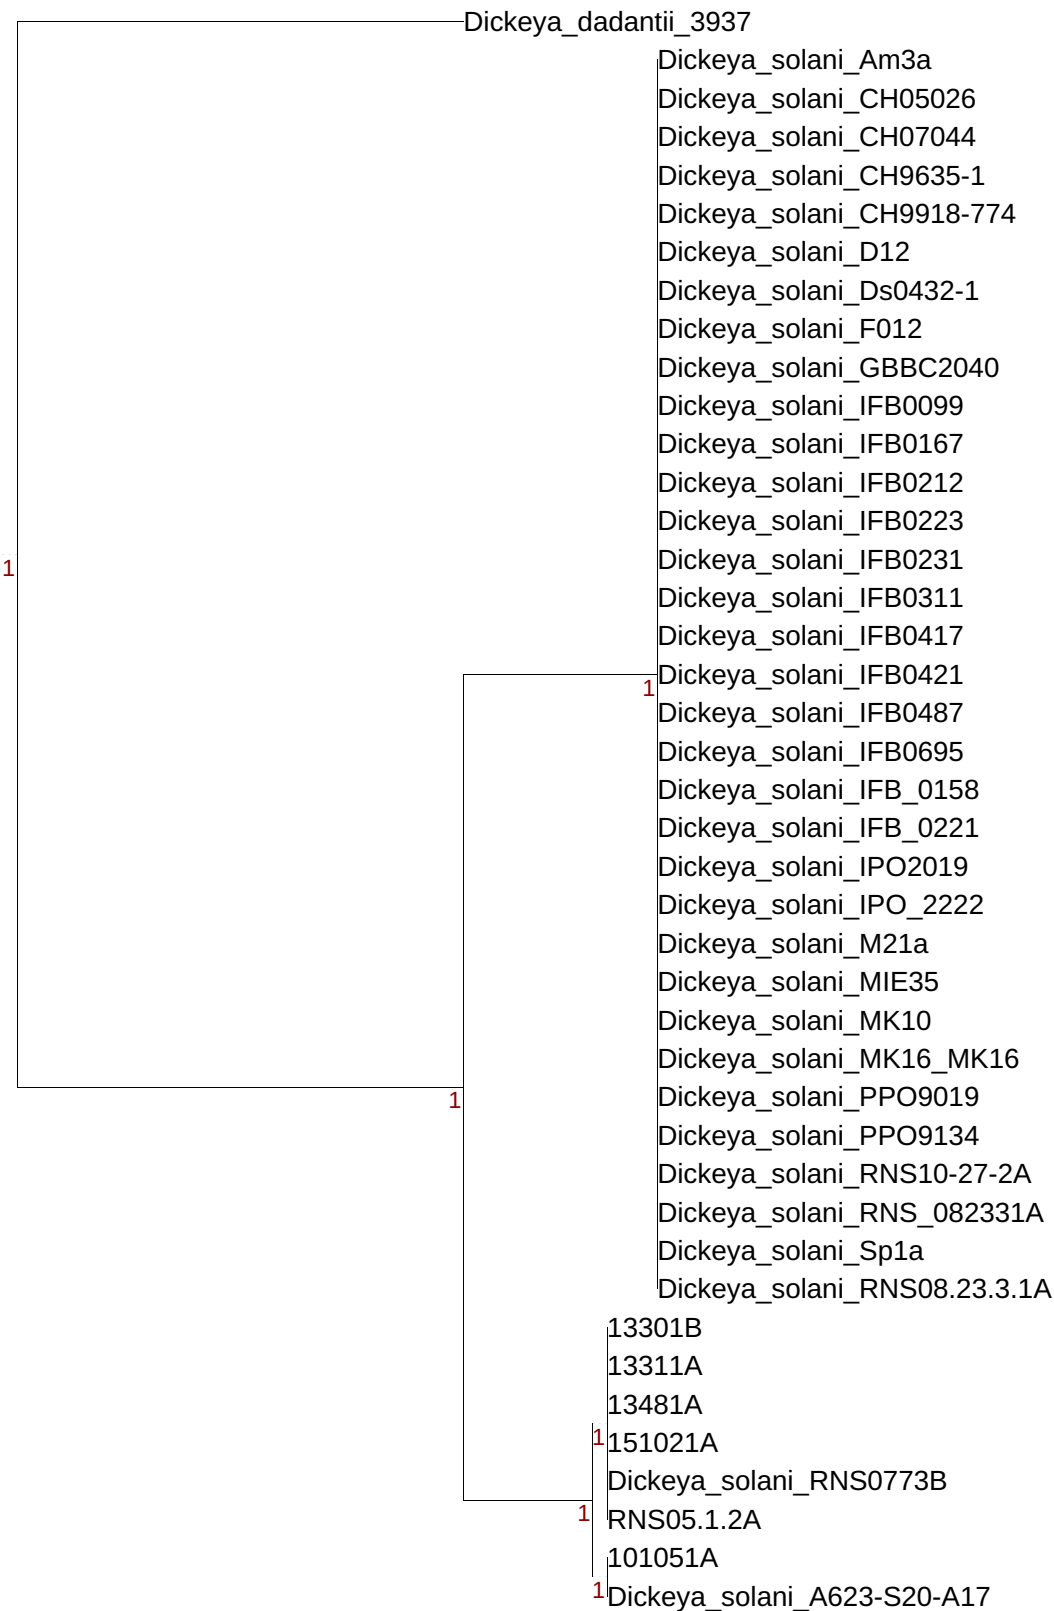

0.00379815

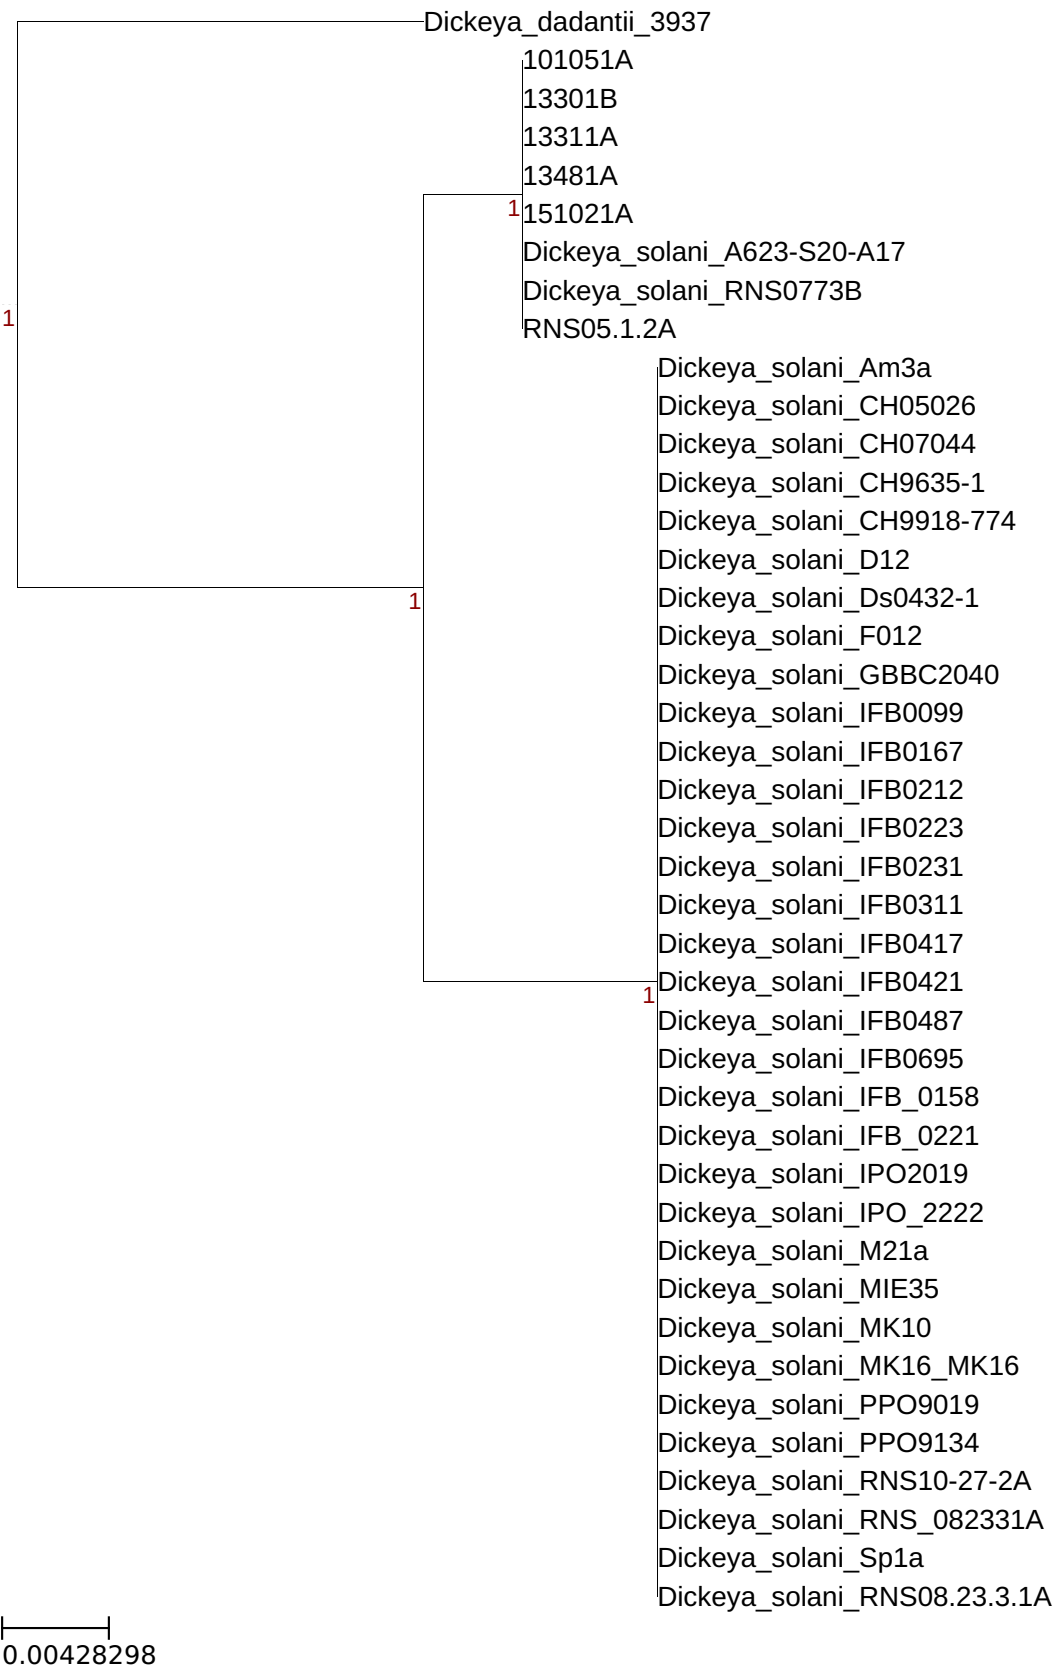

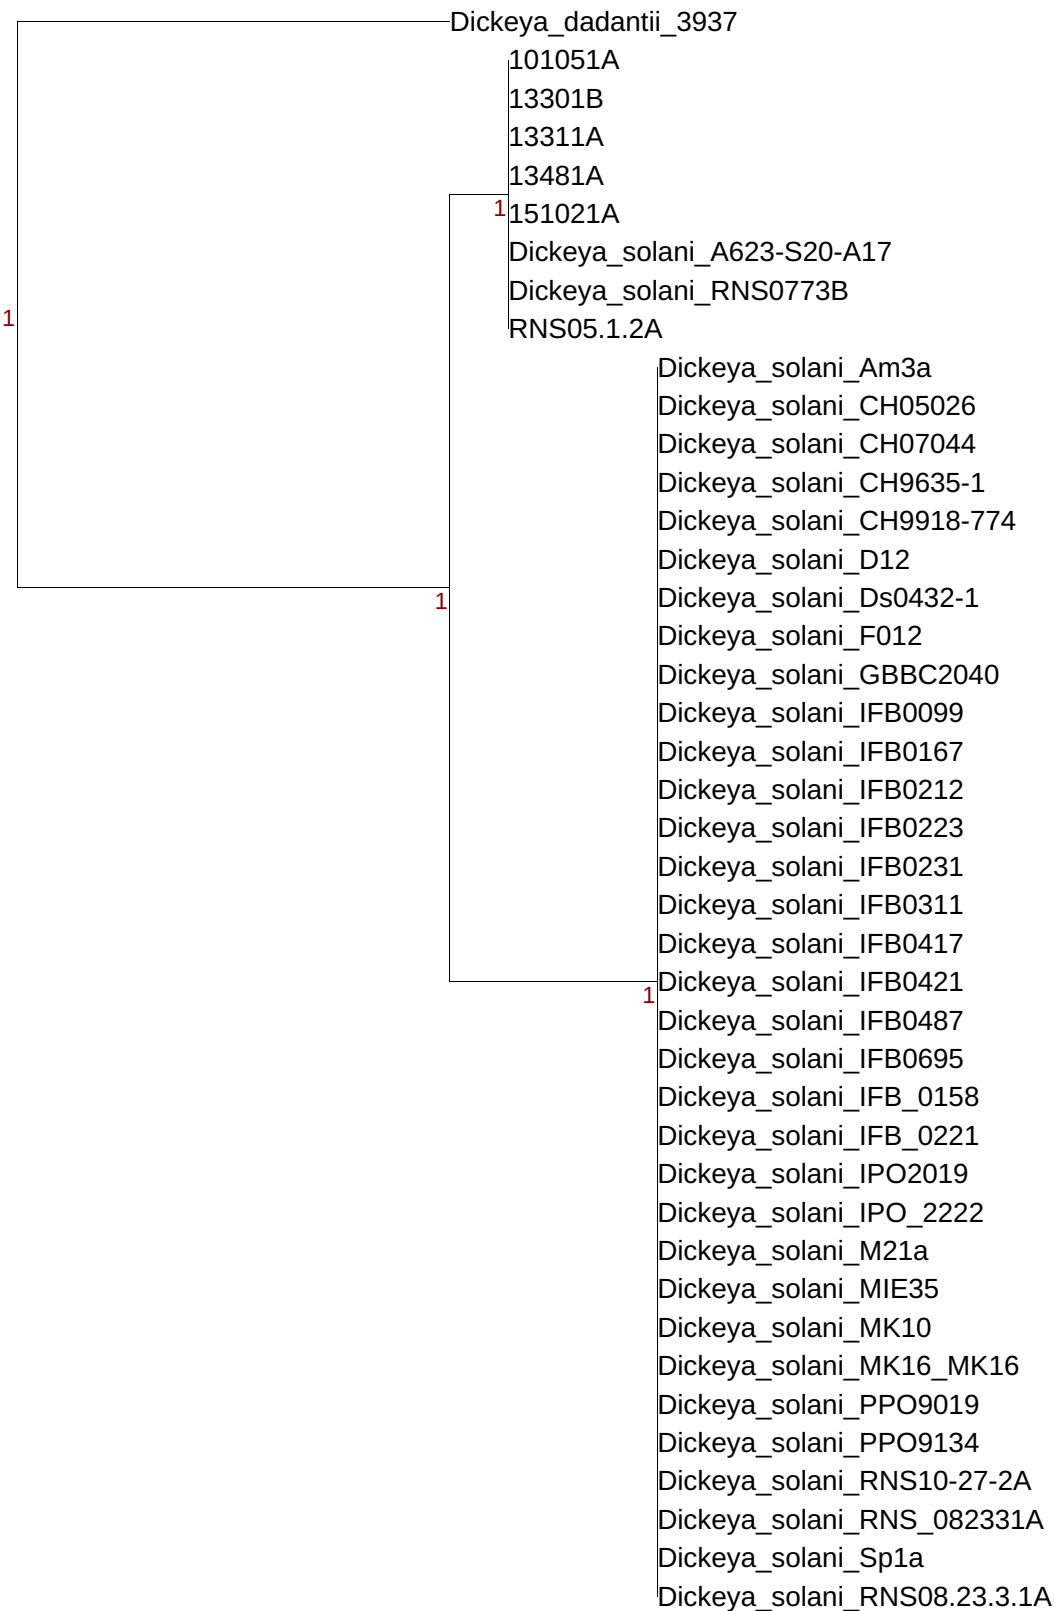

0.00513512

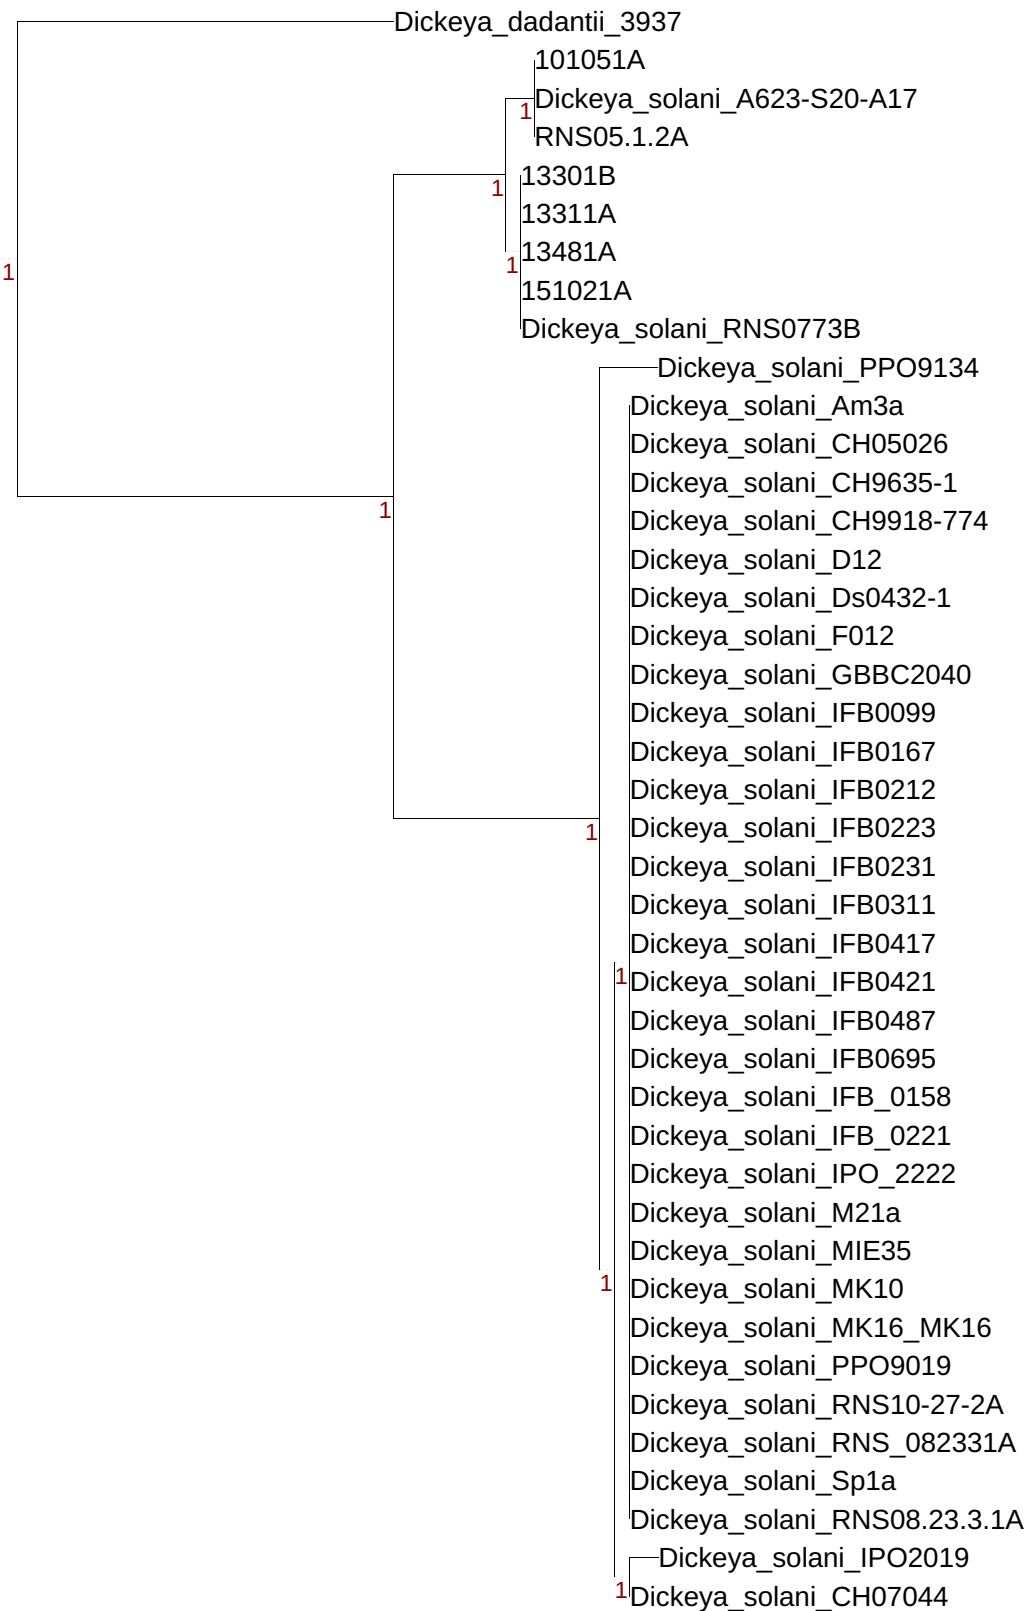

0.00409575

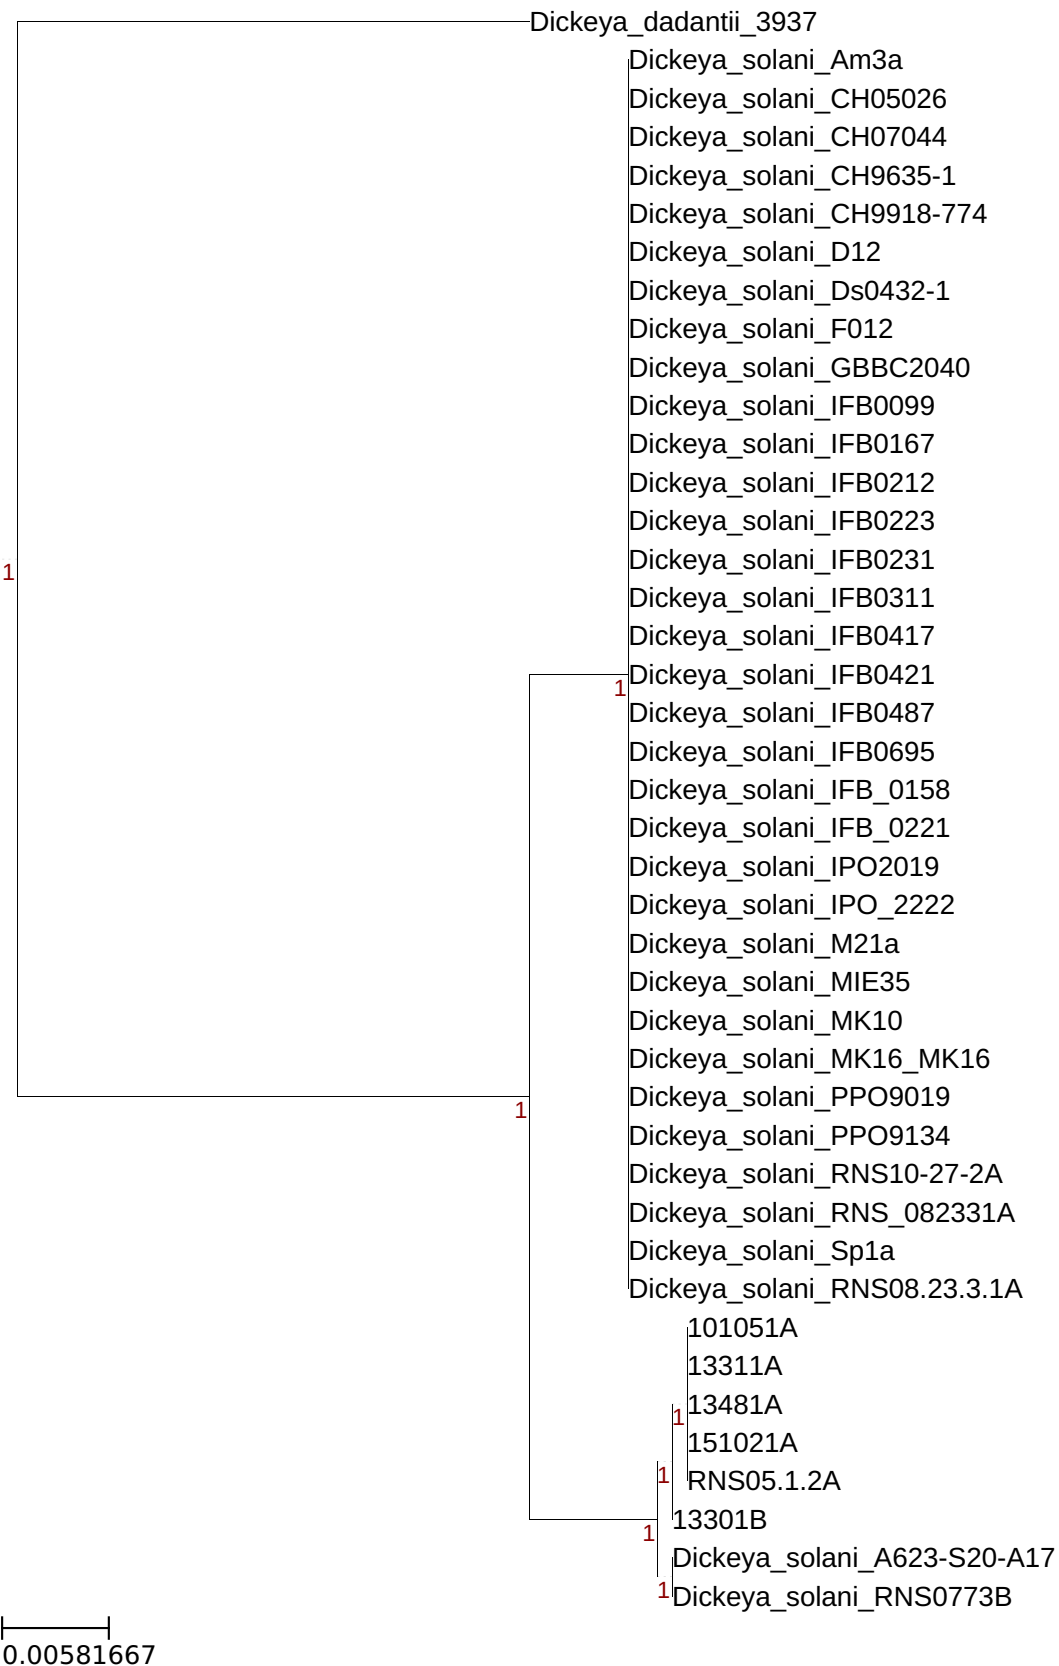

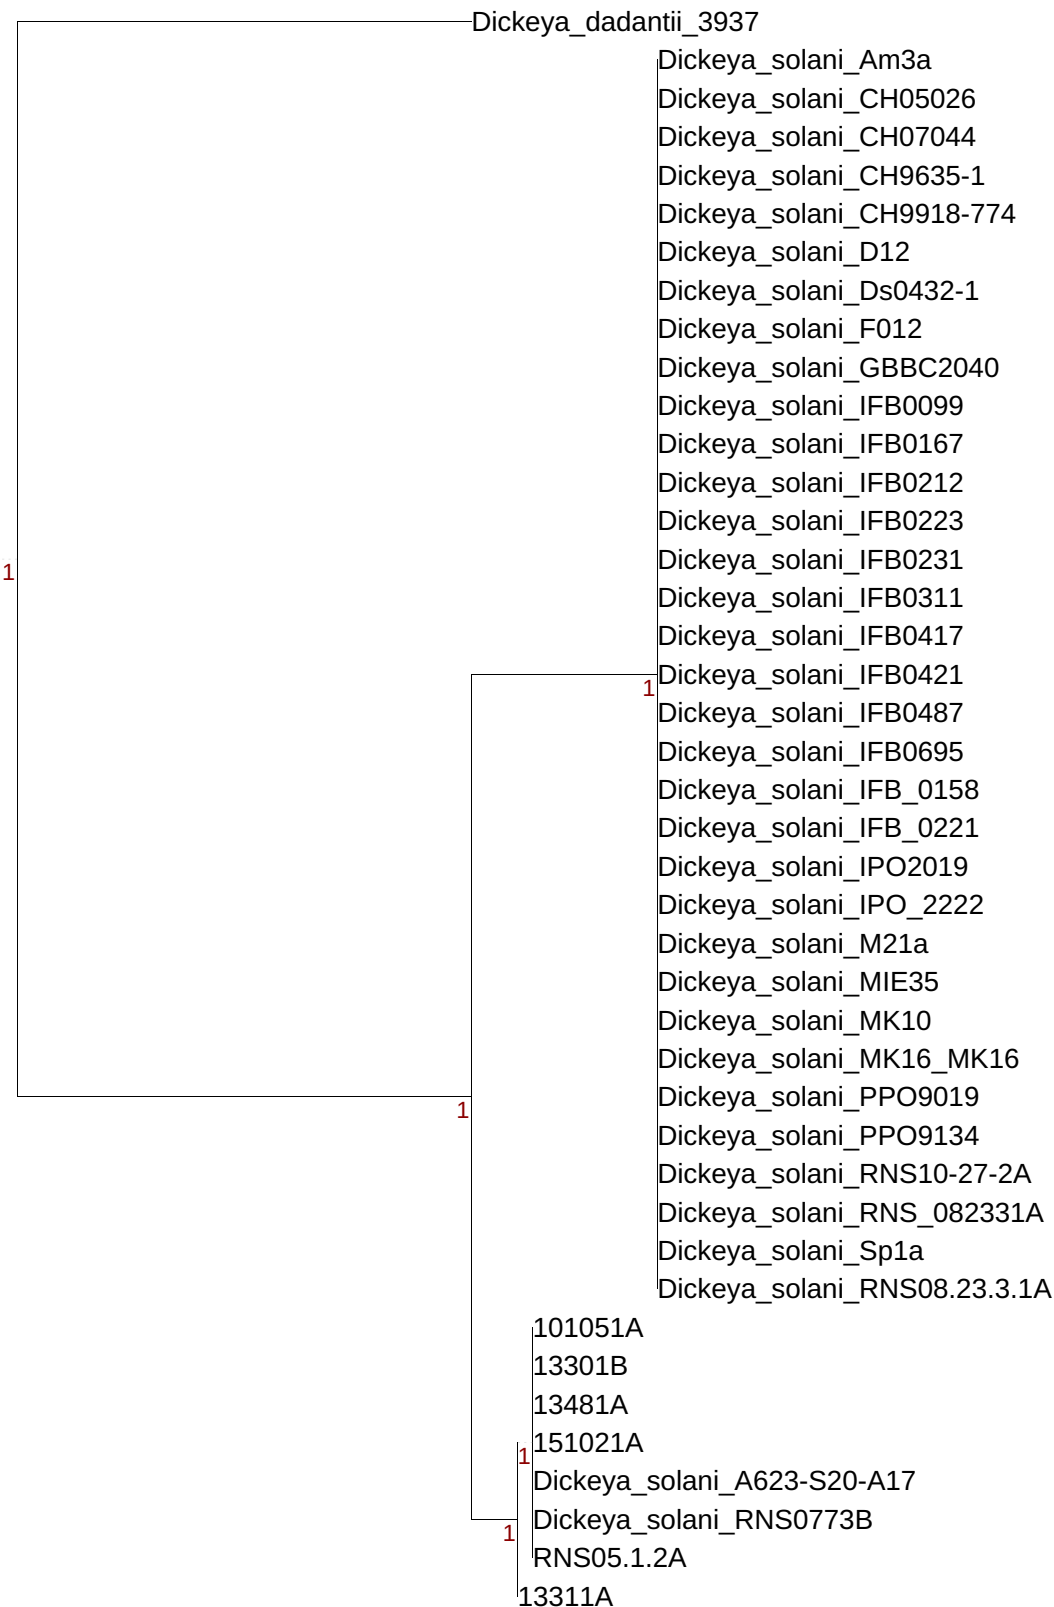

0.00701012



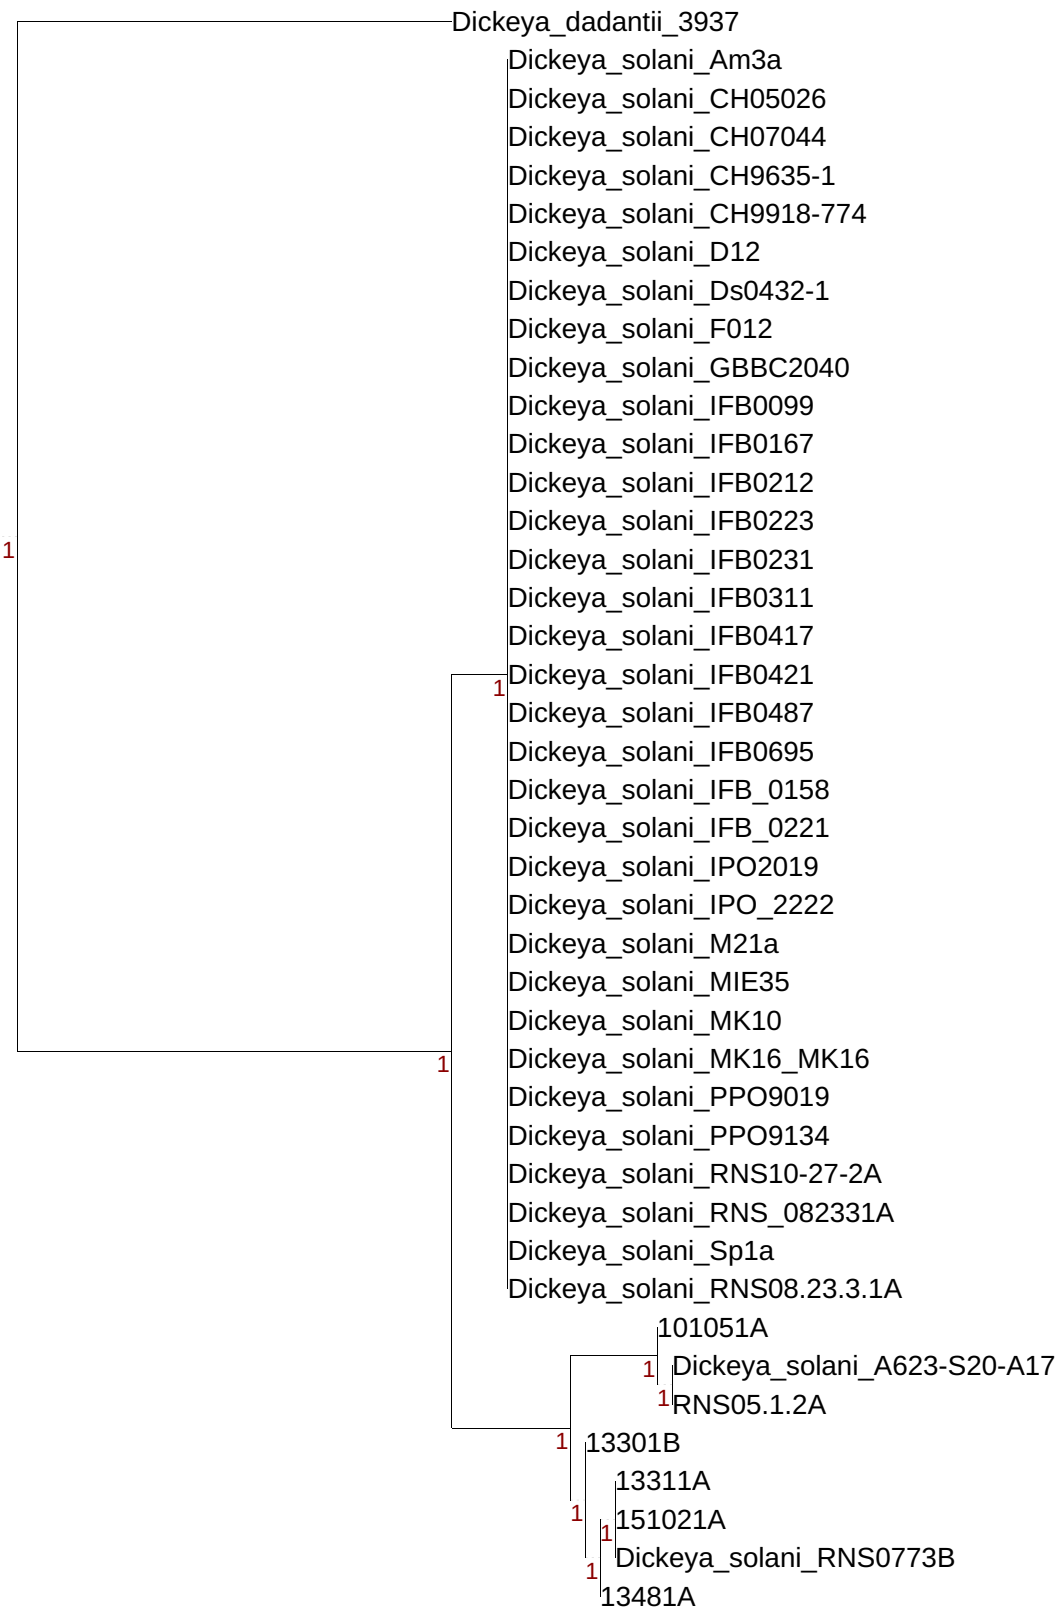

0.00702946

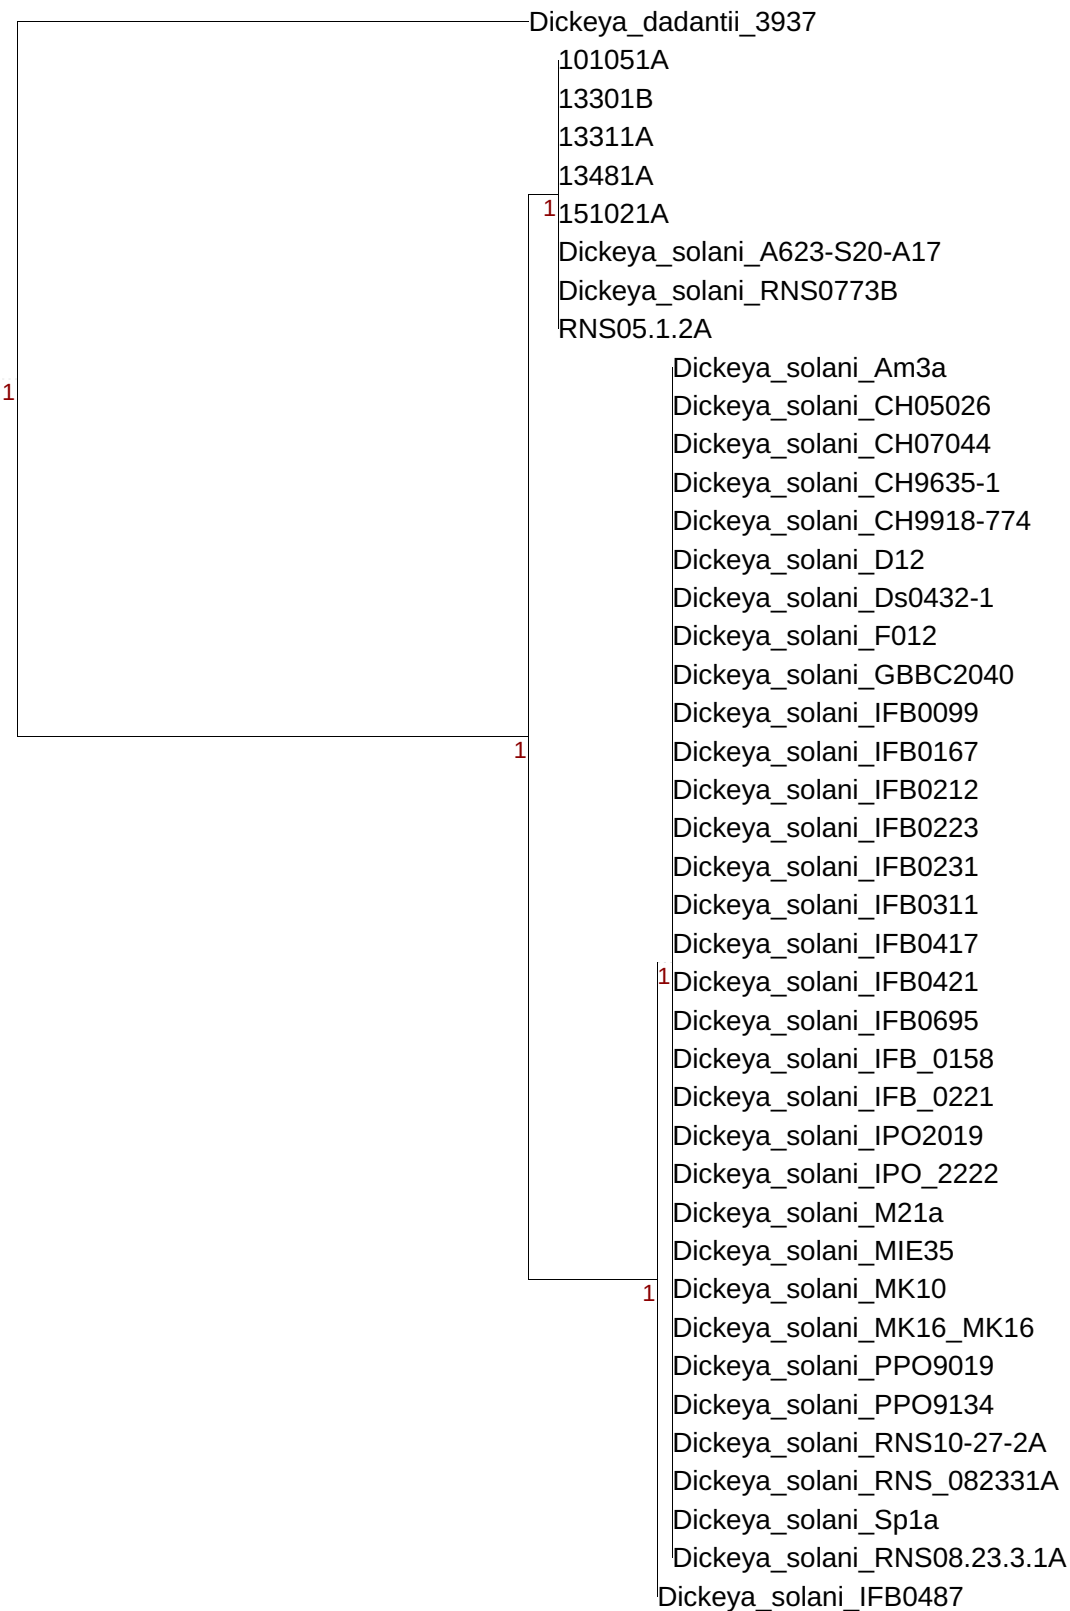

0.00726747

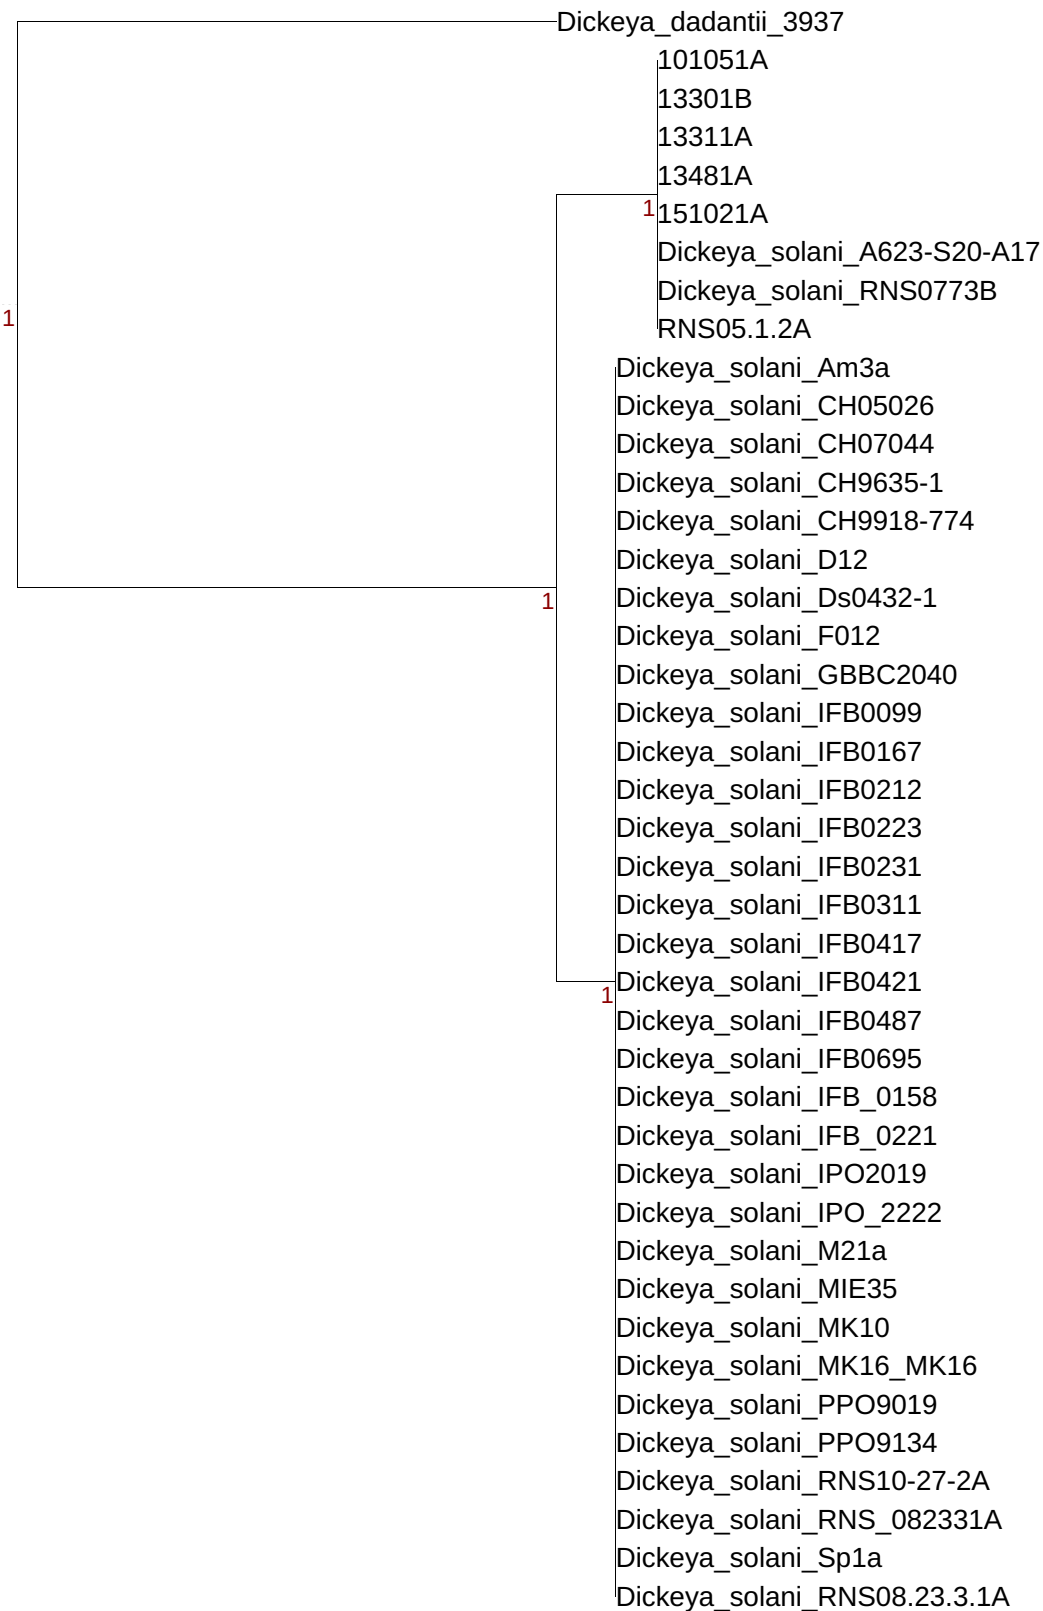

0.00811606

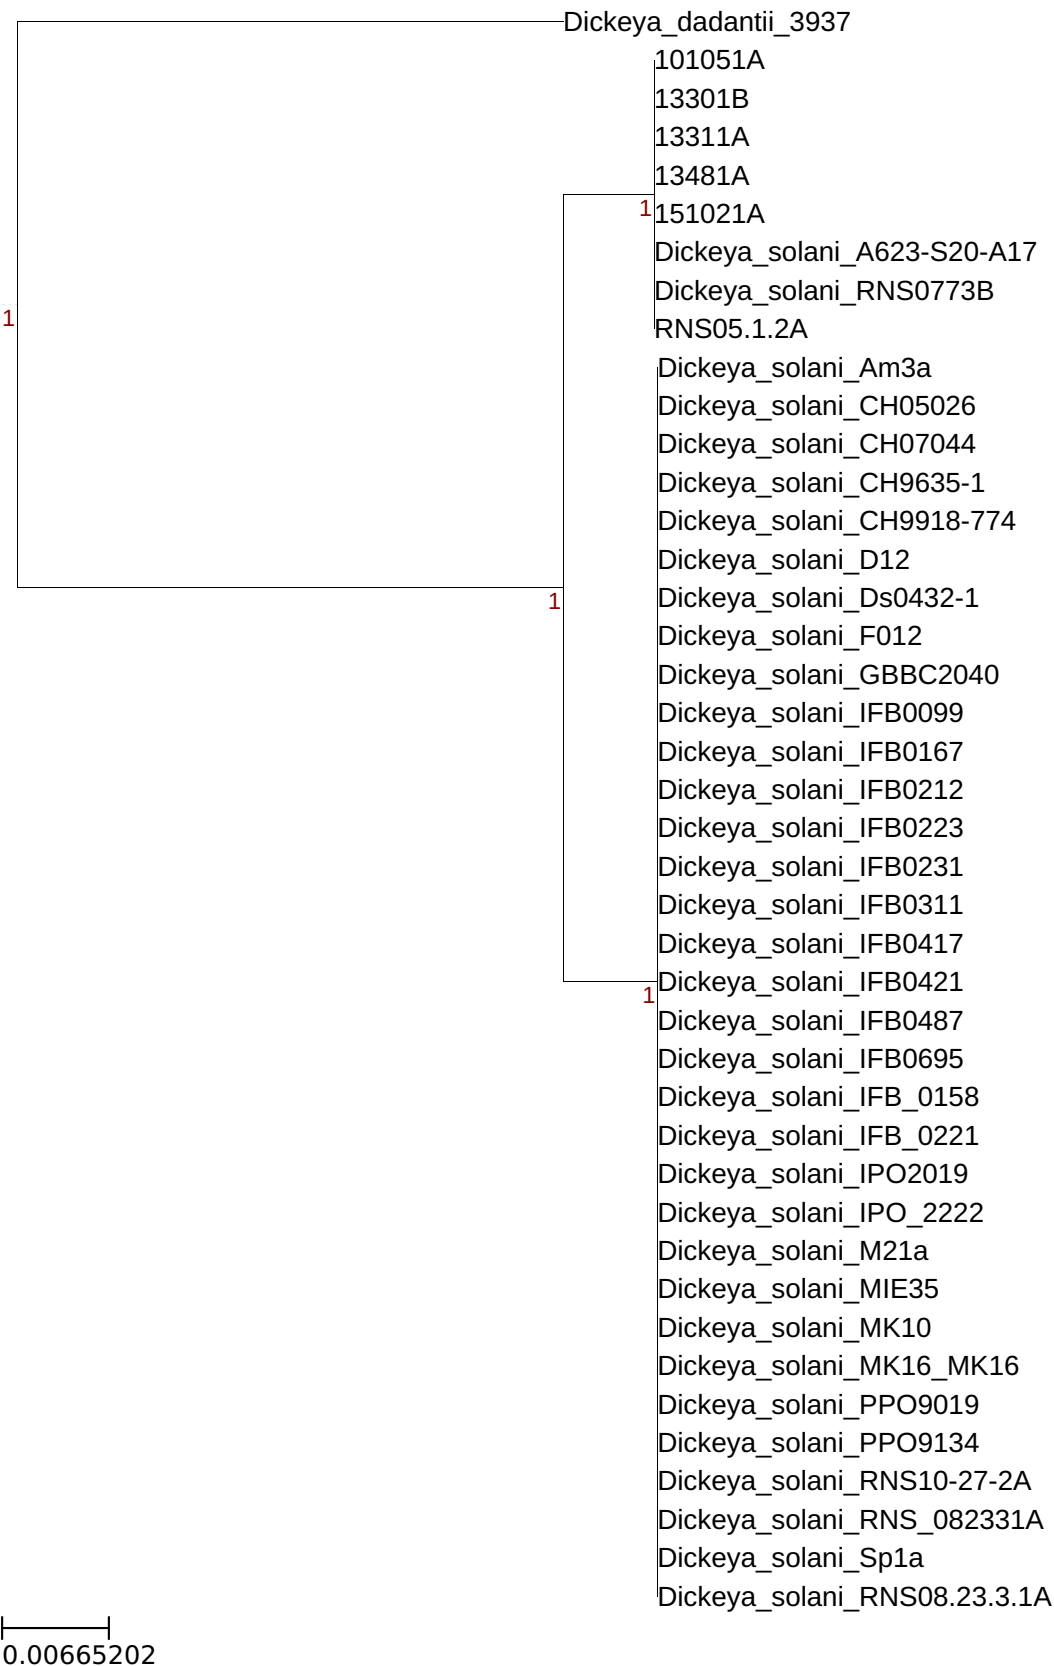

1

---

1

1

0.00499361

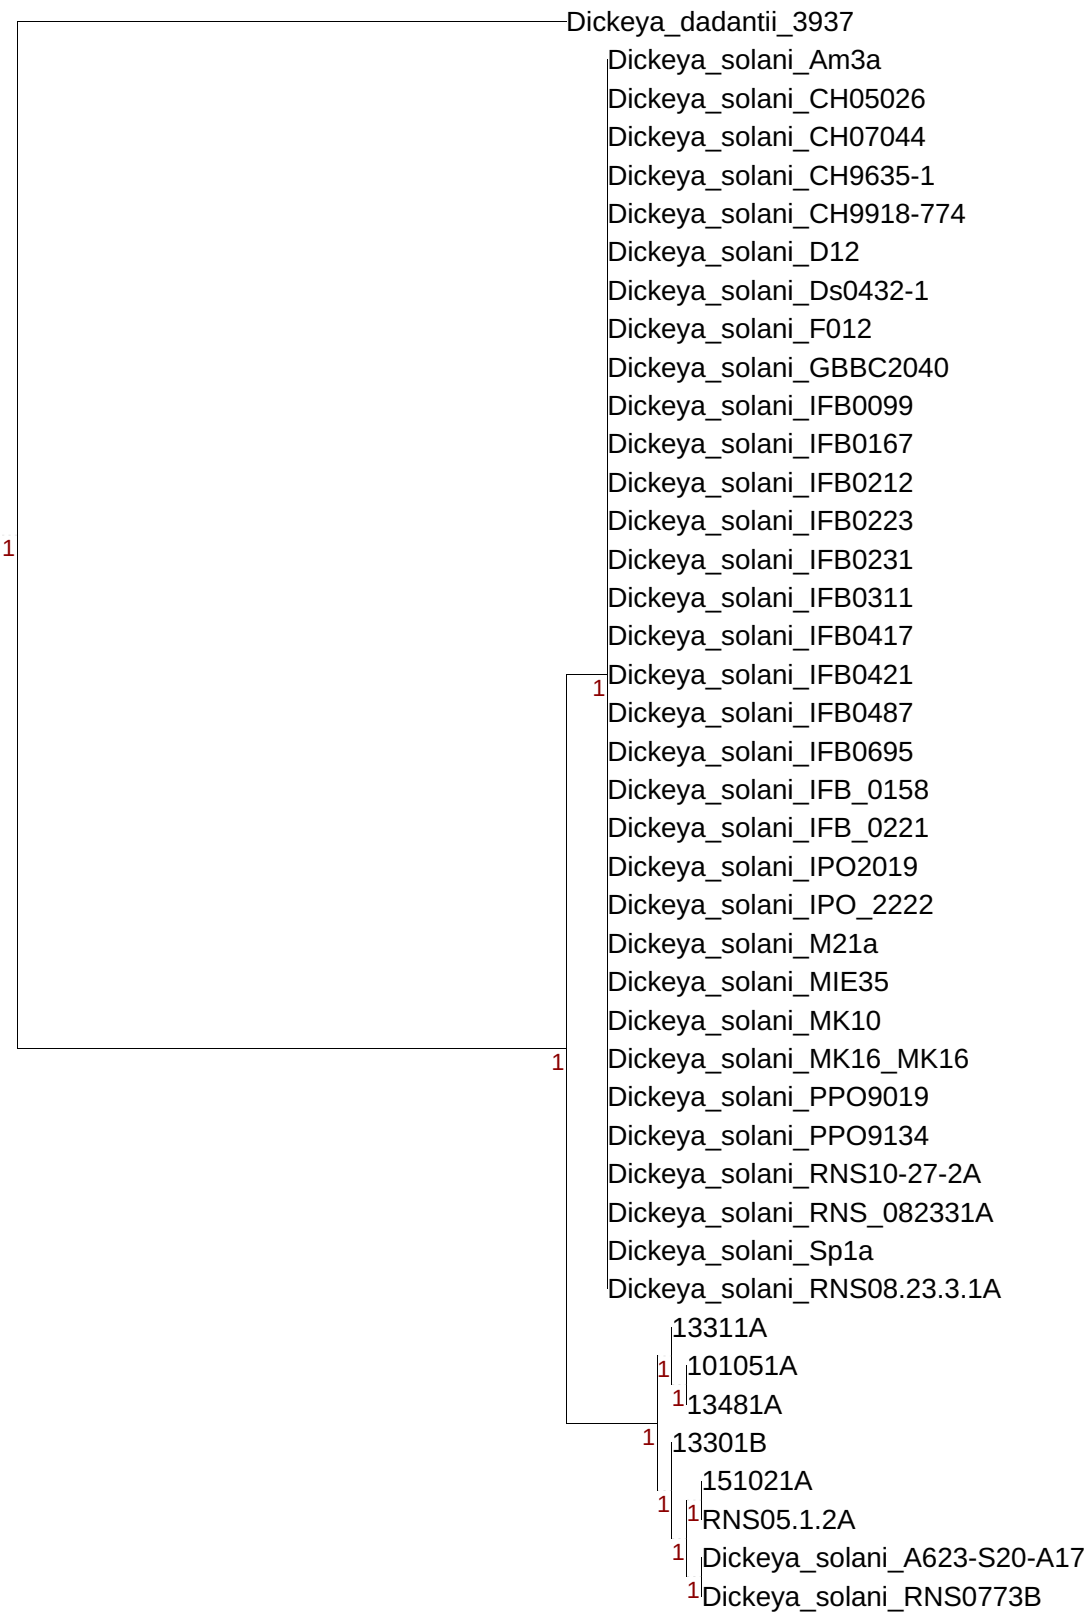

0.00760714

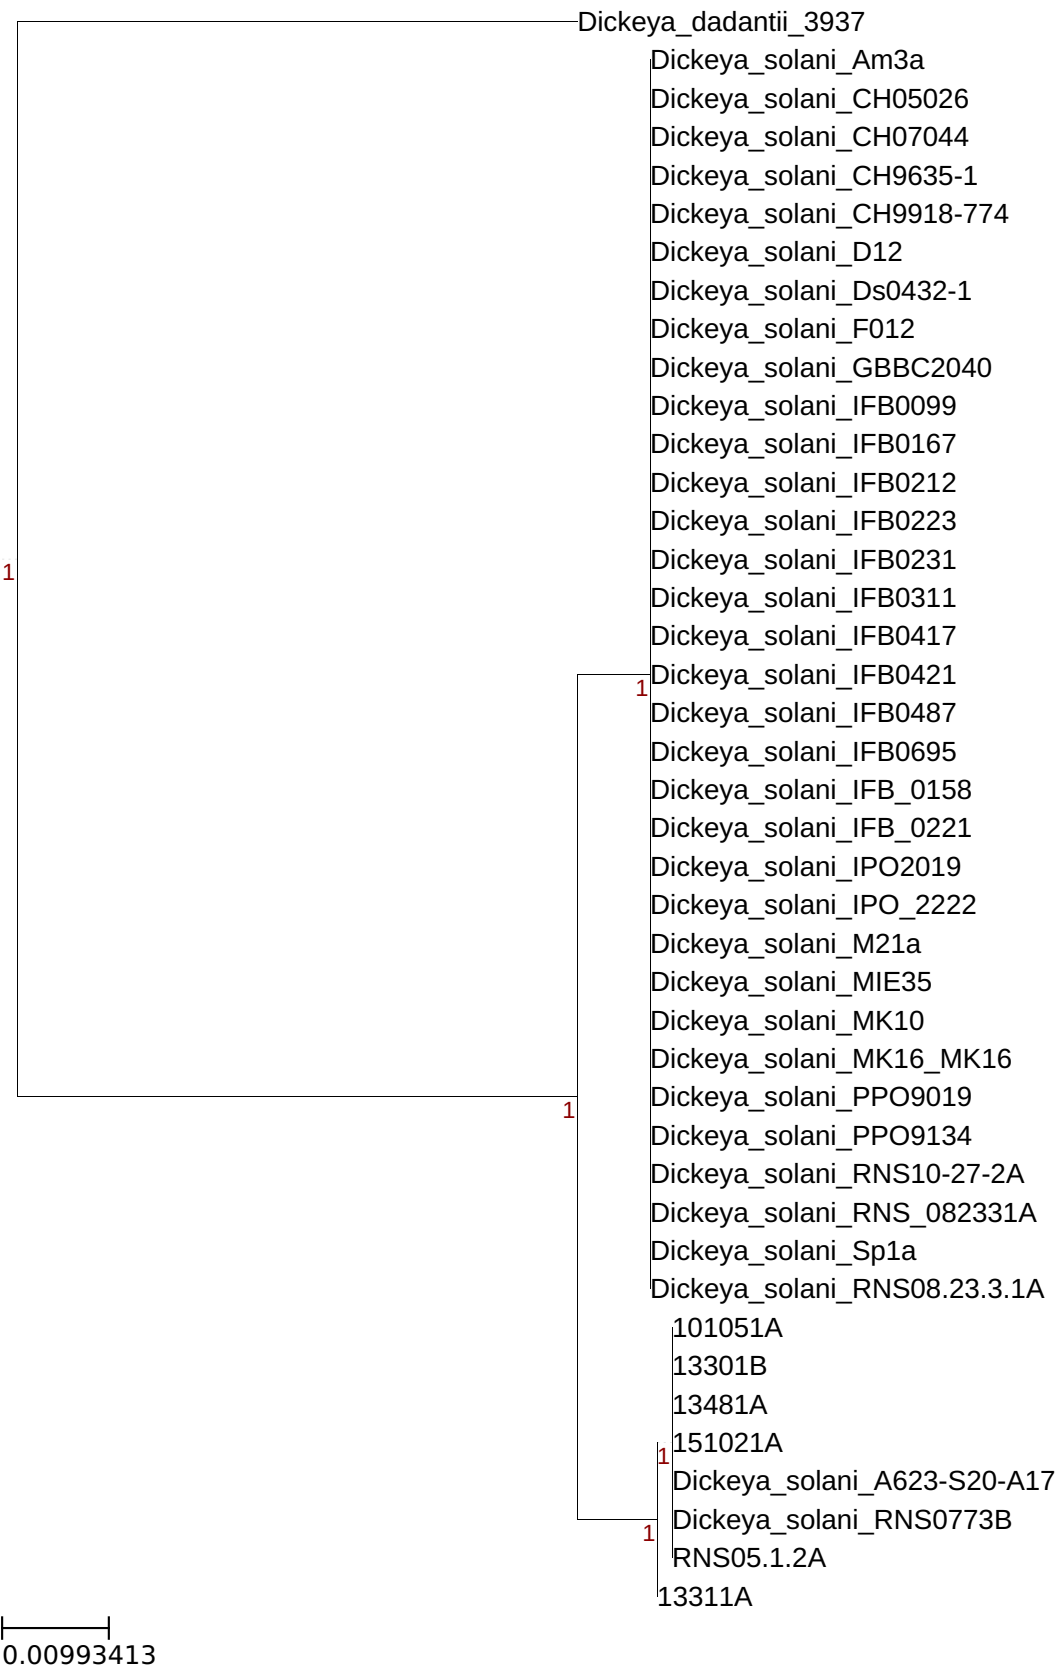

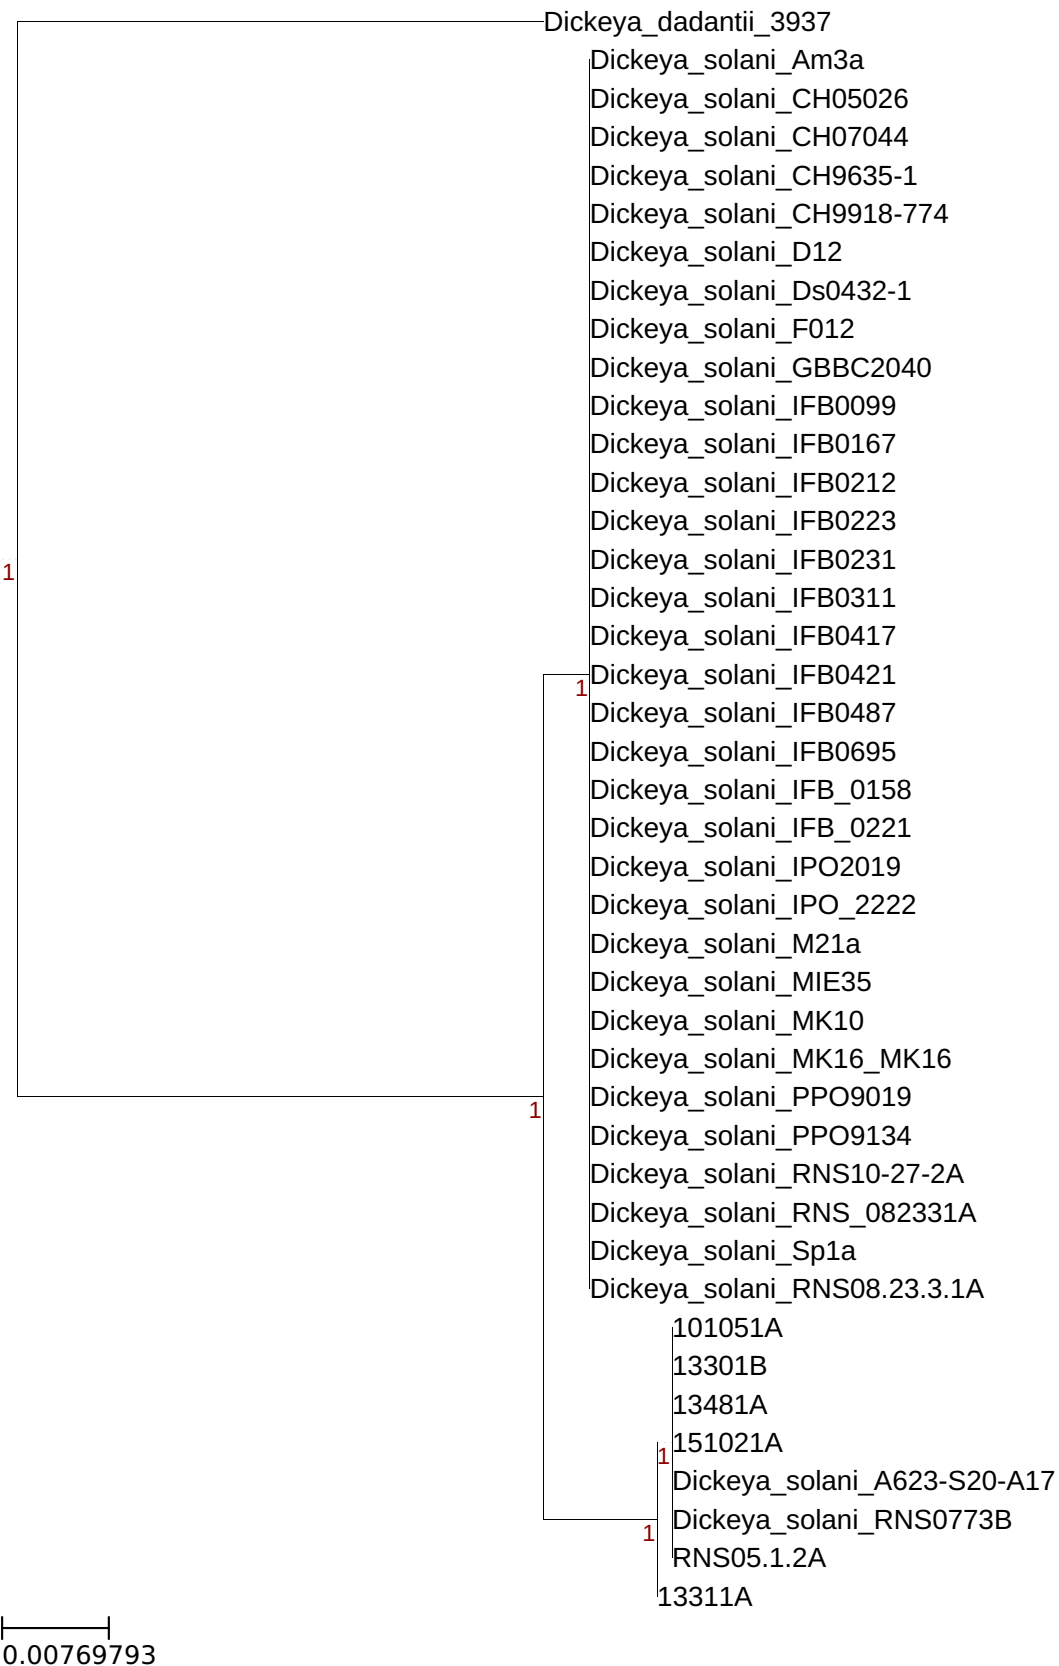



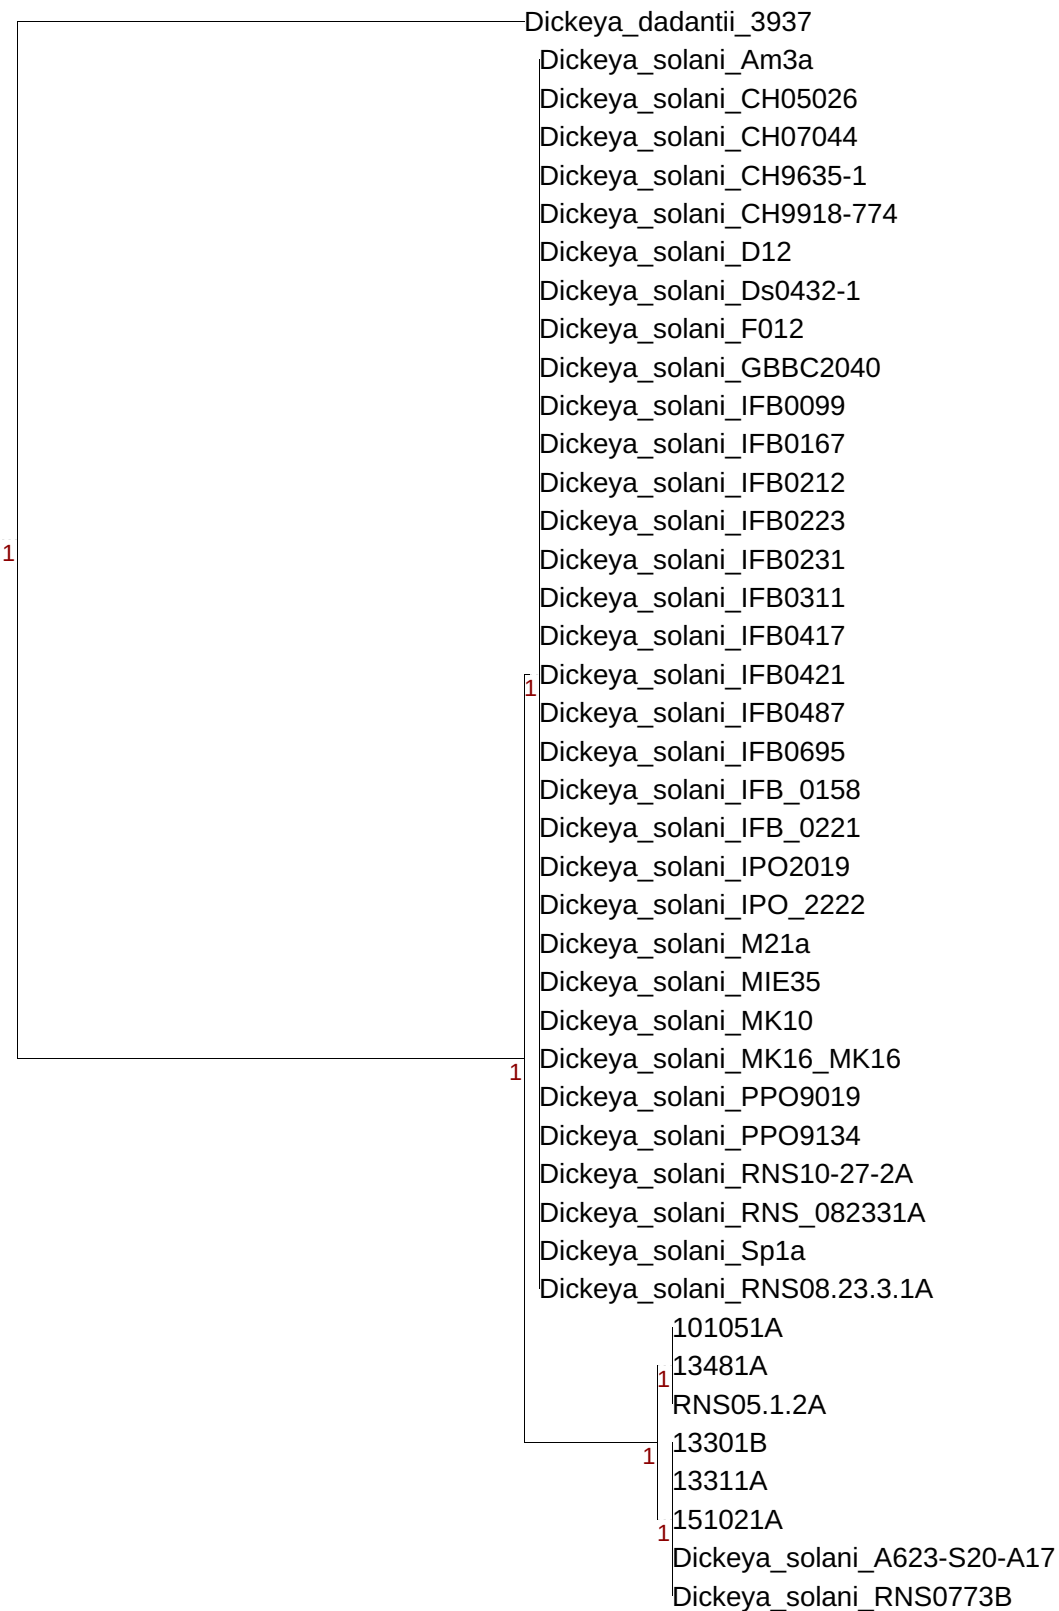

0.00790408
